# Supplementary material
Source: publisher site journal article supplement (https://www.dovepress.com/article/supplementary_file/581720/581720%20Revised%20Supplementary%20Tables.xlsx)
Supplement: Supplementary file 1 [file 581720%20Revised%20Supplementary%20Tables.xlsx]

## Sheet: S1 Table 
S1 Table. STROBE-MR checklist of recommended items to address in reports of Mendelian randomization studies1 2
Item No.	Section	Checklist item	Page No.	Relevant text from manuscript
1	TITLE and ABSTRACT	Indicate Mendelian randomization (MR) as the study’s design in the title and/or the abstract if that is a main purpose of the study	1,2	Section: Abstract
	INTRODUCTION
2	Background	Explain the scientific background and rationale for the reported study. What is the exposure? Is a potential causal relationship between exposure and outcome plausible? Justify why MR is a helpful method to address the study question	3,4	Section: Introduction
3	Objectives	State specific objectives clearly, including pre-specified causal hypotheses (if any). State that MR is a method that, under specific assumptions, intends to estimate causal effects	4	Section: Introduction
	METHODS
4	Study design and data sources	Present key elements of the study design early in the article. Consider including a table listing sources of data for all phases of the study. For each data source contributing to the analysis, describe the following:	5-7	Sections: Study design, Figure 1
	a)	Setting: Describe the study design and the underlying population, if possible. Describe the setting, locations, and relevant dates, including periods of recruitment, exposure, follow-up, and data collection, when available.	5-7	Sections: Methods，Data source，Supplementary Table S2-S3
	b)	Participants: Give the eligibility criteria, and the sources and methods of selection of participants. Report the sample size, and whether any power or sample size calculations were carried out prior to the main analysis	6,7	Sections: Methods，Data source，Supplementary Table S2-S3
	c)	Describe measurement, quality control and selection of genetic variants	6,7	Sections: Data source for Inflammatory Cytokines
	d)	For each exposure, outcome, and other relevant variables, describe methods of assessment and diagnostic criteria for diseases	6,7	Sections: Data source
	e)	Provide details of ethics committee approval and participant informed consent, if relevant	30,31	Sections: Ethics approval and consent to participate
5	Assumptions	Explicitly state the three core IV assumptions for the main analysis (relevance, independence and exclusion restriction) as well assumptions for any additional or sensitivity analysis	5,6	Section: Study design
6	Statistical methods: main analysis	Describe statistical methods and statistics used	18	Section: Statistical Analysis
	a)	Describe how quantitative variables were handled in the analyses (i.e., scale, units, model)	7,8	Section: Mendelian Randomization Analysis
	b)	Describe how genetic variants were handled in the analyses and, if applicable, how their weights were selected	7,8	Section: Mendelian Randomization Analysis
	c)	Describe the MR estimator (e.g. two-stage least squares, Wald ratio) and related statistics. Detail the included covariates and, in case of two-sample MR, whether the same covariate set was used for adjustment in the two samples	7,8	Section: Mendelian Randomization Analysis
	d)	Explain how missing data were addressed	Not Applicable
	e)	If applicable, indicate how multiple testing was addressed	7,8	Section: Mendelian Randomization Analysis
7	Assessment of assumptions	Describe any methods or prior knowledge used to assess the assumptions or justify their validity	5,6	Sections: Study design
8	Sensitivity analyses and additional analyses	Describe any sensitivity analyses or additional analyses performed (e.g. comparison of effect estimates from different approaches, independent replication, bias analytic techniques, validation of instruments, simulations)	8,9	Section: Methods
9	Software and pre-registration
	a)	Name statistical software and package(s), including version and settings used	18	Section: Statistical Analysis
	b)	State whether the study protocol and details were pre-registered (as well as when and where)	Not Applicable
	RESULTS
10	Descriptive data
	a)	Report the numbers of individuals at each stage of included studies and reasons for exclusion. Consider use of a flow diagram	Not Applicable– no individual level data.
	b)	Report summary statistics for phenotypic exposure(s), outcome(s), and other relevant variables (e.g. means, SDs, proportions)	Not Applicable
	c)	If the data sources include meta-analyses of previous studies, provide the assessments of heterogeneity across these studies
	d)	For two-sample MR:	No overlap.
		i. Provide justification of the similarity of the genetic variant-exposure associations between the exposure and outcome samples
		ii. Provide information on the number of individuals who overlap between the exposure and outcome studies
11	Main results
	a)	Report the associations between genetic variant and exposure, and between genetic variant and outcome, preferably on an interpretable scale	18,19	Section: Results, Figure 2,Supplementary Table S6
	b)	Report MR estimates of the relationship between exposure and outcome, and the measures of uncertainty from the MR analysis, on an interpretable scale, such as odds ratio or relative risk per SD difference	18,19	Section: Results, Figure 2,Supplementary Table S6
	c)	If relevant, consider translating estimates of relative risk into absolute risk for a meaningful time period
	d)	Consider plots to visualize results (e.g. forest plot, scatterplot of associations between genetic variants and outcome versus between genetic variants and exposure)	Figure3,4
12	Assessment of assumptions
	a)	Report the assessment of the validity of the assumptions	18-20	Section: Results
	b)	Report any additional statistics (e.g., assessments of heterogeneity across genetic variants, such as I2, Q statistic or E-value)	20	Section: Results
13	Sensitivity analyses and additional analyses
	a)	Report any sensitivity analyses to assess the robustness of the main results to violations of the assumptions	20-22	Section: Results
	b)	Report results from other sensitivity analyses or additional analyses	20-22	Section: Results
	c)	Report any assessment of direction of causal relationship (e.g., bidirectional MR)	20,21	Section: Bidirectional MR Analysis for Causal Direction
	d)	When relevant, report and compare with estimates from non-MR analyses
	e)	Consider additional plots to visualize results (e.g., leave-one-out analyses)	Figure 3
	DISCUSSION
14	Key results	Summarize key results with reference to study objectives	24,25	Discussion
15	Limitations	Discuss limitations of the study, taking into account the validity of the IV assumptions, other sources of potential bias, and imprecision. Discuss both direction and magnitude of any potential bias and any efforts to address them	28,29	Discussion: Limitations
16	Interpretation
	a)	Meaning: Give a cautious overall interpretation of results in the context of their limitations and in comparison with other studies	24-29	Discussion
	b)	Mechanism: Discuss underlying biological mechanisms that could drive a potential causal relationship between the investigated exposure and the outcome, and whether the gene-environment equivalence assumption is reasonable. Use causal language carefully, clarifying that IV estimates may provide causal effects only under certain assumptions	24-29	Discussion
	c)	Clinical relevance: Discuss whether the results have clinical or public policy relevance, and to what extent they inform effect sizes of possible interventions	24-29	Discussion
17	Generalizability	Discuss the generalizability of the study results (a) to other populations, (b) across other exposure periods/timings, and (c) across other levels of exposure	24-29	Discussion
	OTHER INFORMATION
18	Funding	Describe sources of funding and the role of funders in the present study and, if applicable, sources of funding for the databases and original study or studies on which the present study is based	32	Funding
19	Data and data sharing	Provide the data used to perform all analyses or report where and how the data can be accessed, and reference these sources in the article. Provide the statistical code needed to reproduce the results in the article, or report whether the code is publicly accessible and if so, where	31	Availability of data and materials
20	Conflicts of Interest	All authors should declare all potential conflicts of interest	32	Conflicts of Interest
This checklist is copyrighted by the Equator Network under the Creative Commons Attribution 3.0 Unported (CC BY 3.0) license.
1. Skrivankova VW, Richmond RC, Woolf BAR, Yarmolinsky J, Davies NM, Swanson SA, et al. Strengthening the Reporting of Observational Studies in Epidemiology using Mendelian Randomization (STROBE-MR) Statement. JAMA. 2021;under review.
2. Skrivankova VW, Richmond RC, Woolf BAR, Davies NM, Swanson SA, VanderWeele TJ, et al. Strengthening the Reporting of Observational Studies in Epidemiology using Mendelian Randomisation (STROBE-MR): Explanation and Elaboration. BMJ. 2021;375:n2233.

## Sheet: S2 Table 
S2 Table. Genetic association estimates that were used in the primary MR analyses.
Cytokine	rsid	chr_name	chrom_start	EA_exposure	NEA_exposure	BETA_exposure	SE_exposure	P	R2	Fstat	instr
activePAI	rs62465622	7	101015523	C	T	-0.106	0.0263	5.4e-05	0.003	16.307	pQTL
CTACK	rs75842242	9	34587241	C	A	0.172	0.0409	2.5e-05	0.004	14.23	pQTL
CTACK	rs867811	9	34663798	C	T	-0.185	0.0258	7.4e-13	0.013	49.519	pQTL
CTACK	rs2070074	9	34649442	G	A	-0.44	0.0372	2.3e-32	0.043	162.088	pQTL
Eotaxin	rs4471731	17	32556165	A	G	0.063	0.0157	6.7e-05	0.002	20.804	pQTL
Eotaxin	rs9675315	17	32541260	T	C	0.064	0.0156	4.2e-05	0.002	23.269	pQTL
Eotaxin	rs28481802	17	32676872	A	G	0.081	0.0175	3.7e-06	0.003	29.797	pQTL
Eotaxin	rs1860189	17	32578358	A	G	0.101	0.0203	5.7e-07	0.003	33.169	pQTL
Eotaxin	rs77569276	17	32534568	C	G	0.101	0.0204	7.3e-07	0.003	34.137	pQTL
Eotaxin	rs12450911	17	32604425	A	G	0.103	0.0202	3.6e-07	0.003	34.348	pQTL
GROa	rs11724468	4	75086421	A	G	-0.093	0.022	2.5e-05	0.003	22.659	pQTL
GROa	rs75495477	4	74455628	A	G	-0.17	0.0363	2.6e-06	0.004	25.683	pQTL
GROa	rs34700776	4	74527305	T	G	0.092	0.0198	3.4e-06	0.004	27.4	pQTL
GROa	rs6853814	4	74811622	T	C	-0.14	0.0301	3.4e-06	0.004	27.483	pQTL
GROa	rs79320966	4	74988426	A	C	0.201	0.0419	1.5e-06	0.004	29.098	pQTL
GROa	rs3775488	4	74862852	T	C	-0.101	0.0226	7.2e-06	0.005	30.932	pQTL
GROa	rs6815457	4	74714003	A	G	-0.158	0.0216	3e-13	0.009	61.498	pQTL
GROa	rs17202249	4	74617243	T	C	0.245	0.0554	1e-05	0.01	69.588	pQTL
GROa	rs34858592	4	74749301	A	G	0.216	0.0346	3.9e-10	0.011	78.901	pQTL
GROa	rs72855280	4	74835131	A	C	0.826	0.0443	1.2e-77	0.087	649.707	pQTL
GROa	rs1366949	4	74739076	T	G	-0.628	0.0221	9.3e-178	0.131	1023.91	pQTL
HGF	rs5745687	7	81359051	T	C	-0.301	0.0405	1.1e-13	0.01	113.283	pQTL
IL12p70	rs34740816	3	159965219	G	A	-0.116	0.0296	8.2e-05	0.002	12.78	pQTL
IL-16	rs58484457	15	81769674	T	C	0.035	0.0048	2.5e-13	0	10.543	pQTL
IL-16	rs35254208	15	81481945	A	T	-0.041	0.0077	1.4e-07	0.001	10.649	pQTL
IL-16	rs4128767	15	81543407	A	G	-0.051	0.0047	2.1e-27	0.001	23.911	pQTL
IL-16	rs4778893	15	81611253	A	G	-0.063	0.0067	3.9e-21	0.001	25.768	pQTL
IL-16	rs55889255	15	81516565	A	G	0.103	0.0091	5.4e-30	0.002	35.414	pQTL
IL-16	rs75824993	15	81494541	A	C	-0.108	0.0092	9e-32	0.002	36.929	pQTL
IL-16	rs3848180	15	81596590	T	G	0.099	0.0041	1.1e-129	0.005	103.712	pQTL
IL-16	rs4778890	15	81589648	C	G	0.448	0.0089	0	0.022	473.635	pQTL
IL-18	rs76785871	11	112387246	A	G	-0.149	0.0369	5.5e-05	0.003	23.097	pQTL
IL-18	rs10789893	11	112391048	T	C	0.113	0.0247	4.6e-06	0.005	38.034	pQTL
IL-18	rs55772679	11	112235908	T	C	-0.134	0.0239	2.2e-08	0.009	62.039	pQTL
IL-18	rs1534115	11	112210999	A	G	-0.149	0.0251	3.3e-09	0.01	69.511	pQTL
IL-18	rs71478720	11	112009605	T	C	-0.26	0.0273	1.7e-21	0.023	163.445	pQTL
IL-1ra	rs9308676	2	113428167	A	G	0.043	0.0109	7.4e-05	0.001	17.5	pQTL
IL-1ra	rs7594852	2	113521754	T	C	0.045	0.0103	1.3e-05	0.001	19.191	pQTL
IL-1ra	rs45592842	2	113943063	T	G	0.095	0.023	3.8e-05	0.001	20.807	pQTL
IL-1ra	rs3783548	2	113533333	A	G	0.086	0.0207	3.4e-05	0.001	20.963	pQTL
IL-1ra	rs62157451	2	113608418	C	G	-0.096	0.0226	2.3e-05	0.001	20.979	pQTL
IL-1ra	rs6723639	2	113872238	T	C	-0.066	0.0133	7.8e-07	0.001	26.848	pQTL
IL-1ra	rs72831808	2	113979355	C	G	0.124	0.0252	9.7e-07	0.002	27.117	pQTL
IL-1ra	rs3977064	2	114191728	A	C	-0.104	0.0243	2.1e-05	0.002	29.292	pQTL
IL-1ra	rs1191686	2	114094703	T	C	-0.072	0.0131	4.3e-08	0.002	30.009	pQTL
IL-1ra	rs1867868	2	114162983	T	C	0.063	0.0106	2.2e-09	0.002	36.564	pQTL
IL-1ra	rs4591347	2	113658705	T	C	-0.101	0.0149	1.7e-11	0.002	45.084	pQTL
IL-1ra	rs1491585	2	114003621	A	G	-0.075	0.0107	2e-12	0.003	53.891	pQTL
IL-1ra	rs7584409	2	113742734	A	G	-0.086	0.0116	9.5e-14	0.003	55.4	pQTL
IL-1ra	rs114189538	2	113821082	A	G	-0.167	0.0222	6.2e-14	0.003	65.429	pQTL
IL-1ra	rs74667587	2	113895079	A	G	-0.149	0.0141	2.7e-26	0.007	126.716	pQTL
IL-1ra	rs72829856	2	113913287	A	G	0.213	0.0196	3e-27	0.008	142.537	pQTL
IL-1ra	rs6743376	2	113832333	A	C	-0.182	0.0107	3.5e-65	0.015	293.317	pQTL
IL-1ra	rs6734238	2	113841030	A	G	0.204	0.0104	2.5e-85	0.02	384.119	pQTL
IL-2ra	rs3136613	10	6020749	C	T	0.096	0.024	6.4e-05	0.004	15.412	pQTL
IL-2ra	rs7084255	10	6184167	T	A	0.134	0.0304	1e-05	0.005	19.277	pQTL
IL-2ra	rs4747891	10	6188119	G	C	0.18	0.0375	1.6e-06	0.006	20.753	pQTL
IL-2ra	rs7077067	10	6132692	C	T	0.111	0.024	3.7e-06	0.006	21.983	pQTL
IL-2ra	rs676063	10	5986900	G	T	0.146	0.0354	3.7e-05	0.006	22.481	pQTL
IL-2ra	rs7898286	10	6009462	G	T	-0.119	0.0252	2.5e-06	0.007	24.358	pQTL
IL-2ra	rs2182409	10	6209218	C	T	-0.12	0.0249	1.5e-06	0.007	25.369	pQTL
IL-2ra	rs3136614	10	6005674	G	A	0.165	0.0363	5.3e-06	0.008	30.084	pQTL
IL-2ra	rs9423654	10	5605334	G	C	0.135	0.0283	1.7e-06	0.008	30.918	pQTL
IL-2ra	rs17403348	10	5827901	C	T	0.334	0.0805	3.4e-05	0.013	47.167	pQTL
IL-2ra	rs140148883	10	5795575	G	A	-0.402	0.0937	1.8e-05	0.016	57.973	pQTL
IL-2ra	rs12722588	10	6060433	C	T	0.334	0.0334	1.6e-23	0.026	96.209	pQTL
IL-2ra	rs34507893	10	6124598	G	A	-0.735	0.1155	2e-10	0.057	220.921	pQTL
IL-2ra	rs12722497	10	6095928	C	A	-0.629	0.0482	6.9e-39	0.093	376.999	pQTL
IL-6	rs57349960	7	22519455	CG	C	0.061	0.0153	6.3e-05	0.002	16.085	pQTL
IL-7	rs6473130	8	79862570	C	A	-0.098	0.0251	9.7e-05	0.005	16.088	pQTL
IL-8	rs7655660	4	74589597	A	G	-0.188	0.0237	2.7e-15	0.004	71.867	pQTL
IP-10	rs4512021	4	76954407	A	G	-0.077	0.0152	4.2e-07	0.003	25.94	pQTL
IP-10	rs12508444	4	76750708	T	C	-0.084	0.0172	1.2e-06	0.003	26.629	pQTL
IP-10	rs76467436	4	76677445	A	G	-0.172	0.033	1.8e-07	0.003	29.696	pQTL
IP-10	rs13141895	4	77077885	T	C	-0.114	0.022	2.1e-07	0.004	32.601	pQTL
IP-10	rs144775225	4	76666780	T	C	-0.232	0.0533	1.4e-05	0.007	58.15	pQTL
MCP1	rs1594542	17	32654317	A	T	-0.054	0.0131	4.4e-05	0.001	22.14	pQTL
MCP1	rs12601658	17	32533423	A	T	-0.074	0.0152	1.2e-06	0.002	32.827	pQTL
MCP3	rs12600832	17	32679760	T	G	-0.204	0.0504	5.4e-05	0.006	18.491	pQTL
MCP3	rs10512462	17	32499059	A	G	0.205	0.0467	1.2e-05	0.006	21.253	pQTL
MCP3	rs117940142	17	32527035	A	C	0.22	0.0483	5.5e-06	0.006	21.469	pQTL
MCP3	rs371194085	17	32619468	A	T	-0.128	0.0269	1.8e-06	0.008	25.877	pQTL
MCP3	rs2079662	17	32501275	T	C	-0.251	0.0413	1.3e-09	0.011	38.194	pQTL
MCP3	rs61578494	17	32535620	C	G	-0.366	0.0509	6e-13	0.016	53.285	pQTL
MCP3	rs16969376	17	32561165	A	G	-0.424	0.0513	1.5e-16	0.02	68.412	pQTL
MCP3	rs16969377	17	32561182	A	G	-0.43	0.052	1.4e-16	0.021	69.097	pQTL
MCP3	rs2005314	17	32498797	T	C	0.248	0.0313	2e-15	0.022	74.188	pQTL
MCP3	rs1029719	17	32550864	T	C	0.213	0.025	1.4e-17	0.022	74.235	pQTL
MCP3	rs560964485	17	32554384	T	C	-0.367	0.0443	1e-16	0.027	92.288	pQTL
MCP3	rs408121	17	32677148	A	G	0.262	0.027	2.8e-22	0.031	106.69	pQTL
MCP3	rs1133763	17	32647831	A	C	0.588	0.0328	7.1e-72	0.092	334.434	pQTL
MCSF	rs12401850	1	110437378	A	G	0.056	0.013	1.8e-05	0.001	22.542	pQTL
MCSF	rs140223635	1	110543879	A	G	-0.11	0.0259	2.4e-05	0.002	23.178	pQTL
MCSF	rs72687271	1	110491364	A	G	-0.109	0.0251	1.5e-05	0.002	23.932	pQTL
MCSF	rs6699144	1	110438926	T	C	0.06	0.0131	4.1e-06	0.002	24.995	pQTL
MCSF	rs6695237	1	110415626	A	G	-0.06	0.0118	3.3e-07	0.002	28.743	pQTL
MCSF	rs116675658	1	110613543	T	G	-0.126	0.0272	3.7e-06	0.002	28.752	pQTL
MCSF	rs72974777	1	110462488	A	G	0.133	0.0265	5.1e-07	0.002	36.841	pQTL
MCSF	rs17668350	1	110543223	T	C	-0.146	0.022	3.9e-11	0.003	47.664	pQTL
MCSF	rs672992	1	110639873	T	C	0.08	0.0118	8.6e-12	0.003	54.134	pQTL
MCSF	rs3768471	1	110612436	A	G	0.17	0.0229	1.1e-13	0.004	69.838	pQTL
MCSF	rs333968	1	110460520	T	C	-0.141	0.0183	1.5e-14	0.004	71.036	pQTL
MCSF	rs1058885	1	110466466	T	C	-0.126	0.0114	2.9e-28	0.007	124.489	pQTL
MCSF	rs11579145	1	110501597	A	G	-0.175	0.0111	7.3e-56	0.015	249.194	pQTL
MIF	rs2739327	22	24334023	T	A	-0.126	0.03	2.9e-05	0.008	27.373	pQTL
MIF	rs2330634	22	24250795	G	C	-0.155	0.0248	4.5e-10	0.011	39.668	pQTL
MIG	rs55876513	4	76883698	G	T	-0.164	0.0254	1e-10	0.011	41.394	pQTL
MIP1a	rs143357708	17	34909948	A	G	-0.088	0.0226	0.0001	0.001	16.804	pQTL
MIP1a	rs7208788	17	34823204	A	G	-0.059	0.015	8.9e-05	0.001	17.756	pQTL
MIP1a	rs1127790	17	34304247	A	G	0.083	0.0185	8.1e-06	0.001	22.545	pQTL
MIP1a	rs112689088	17	34307457	T	C	0.089	0.0189	2.6e-06	0.001	24.445	pQTL
MIP1a	rs41389847	17	34324617	T	C	0.114	0.0239	1.8e-06	0.001	25.291	pQTL
MIP1a	rs868340	17	34832620	A	T	-0.057	0.0106	7.1e-08	0.002	29.453	pQTL
MIP1a	rs571801759	17	34422876	T	C	-0.153	0.0332	4.4e-06	0.004	33.638	pQTL
MIP1a	rs2282674	17	34524523	A	G	0.078	0.019	4e-05	0.003	34.646	pQTL
MIP1a	rs854675	17	34359900	T	C	-0.101	0.0181	2.5e-08	0.002	35.986	pQTL
MIP1a	rs1542611	17	34848436	T	G	-0.105	0.0178	3.8e-09	0.002	37.104	pQTL
MIP1a	rs16972027	17	34451097	A	G	0.131	0.0232	1.7e-08	0.003	42.507	pQTL
MIP1a	rs4795113	17	34478464	C	G	-0.103	0.0195	1.3e-07	0.003	50.094	pQTL
MIP1a	rs66967287	17	34352005	T	C	-0.122	0.0178	7.6e-12	0.003	50.946	pQTL
MIP1a	rs41356845	17	34325248	C	G	-0.121	0.0162	7.9e-14	0.003	56.744	pQTL
MIP1a	rs2735835	17	34393296	A	G	0.081	0.0108	1e-13	0.003	59.284	pQTL
MIP1a	rs4796155	17	34445646	A	T	0.097	0.0166	4.6e-09	0.004	59.745	pQTL
MIP1a	rs67943086	17	34357820	A	G	0.132	0.0185	9e-13	0.003	63.071	pQTL
MIP1a	rs16971993	17	34445397	T	C	0.162	0.0241	1.8e-11	0.005	68.349	pQTL
MIP1a	rs117010890	17	34916971	T	C	-0.211	0.0281	6.1e-14	0.005	79.808	pQTL
MIP1a	rs854660	17	34354803	A	G	-0.099	0.0106	1.1e-20	0.005	89.574	pQTL
MIP1a	rs56121841	17	34363587	T	G	-0.111	0.0118	4.5e-21	0.005	94.756	pQTL
MIP1a	rs9911791	17	34820996	A	G	0.134	0.0145	3.1e-20	0.005	98.553	pQTL
MIP1a	rs4796217	17	34819191	T	C	0.117	0.0119	7.6e-23	0.006	106.278	pQTL
MIP1a	rs1018913	17	34464074	C	G	-0.162	0.0204	2.6e-15	0.013	110.644	pQTL
MIP1a	rs8082120	17	34445325	A	G	-0.141	0.015	4e-21	0.008	124.049	pQTL
MIP1a	rs2840162	17	34392547	A	G	0.194	0.0174	1.2e-28	0.007	133.104	pQTL
MIP1a	rs11651338	17	34816489	T	C	0.122	0.0116	1e-25	0.007	133.201	pQTL
MIP1a	rs62079697	17	34393028	T	C	0.193	0.0174	1.2e-28	0.007	134.454	pQTL
MIP1a	rs7213887	17	34439230	A	G	-0.213	0.024	8e-19	0.011	137.996	pQTL
MIP1a	rs854462	17	34386090	A	G	0.174	0.015	5.1e-31	0.007	143.218	pQTL
MIP1a	rs62081560	17	34442541	T	G	0.169	0.0139	4.4e-34	0.01	190.635	pQTL
MIP1a	rs12948732	17	34462907	T	C	-0.216	0.018	5.1e-33	0.011	208.451	pQTL
MIP1a	rs1634517	17	34432403	A	C	0.401	0.0117	2.1e-258	0.059	1194.4	pQTL
MIP1b	rs117086316	17	34070299	A	G	-0.078	0.0186	2.7e-05	0.001	10.64	pQTL
MIP1b	rs1005107	17	34340592	T	C	-0.085	0.0161	1.2e-07	0.001	15.361	pQTL
MIP1b	rs62078170	17	34110979	T	G	-0.077	0.0148	1.9e-07	0.002	17.526	pQTL
MIP1b	rs79010839	17	34901949	T	C	0.115	0.0195	3e-09	0.002	18.068	pQTL
MIP1b	rs719828	17	34465375	A	G	0.088	0.0178	7.1e-07	0.002	19.122	pQTL
MIP1b	rs854633	17	34374462	T	C	-0.063	0.0083	5.5e-14	0.002	21.188	pQTL
MIP1b	rs11657788	17	34273139	A	C	-0.112	0.016	2.8e-12	0.002	22.844	pQTL
MIP1b	rs8075916	17	34343845	A	C	-0.081	0.0111	2.5e-13	0.002	23.005	pQTL
MIP1b	rs8064395	17	34272942	A	C	-0.107	0.0141	3.2e-14	0.002	23.671	pQTL
MIP1b	rs1634503	17	34421139	A	G	-0.075	0.0097	9.5e-15	0.002	25.013	pQTL
MIP1b	rs8074386	17	34452725	T	C	-0.088	0.0139	2.3e-10	0.002	25.926	pQTL
MIP1b	rs60516659	17	34403297	A	G	0.12	0.0149	7.4e-16	0.002	27.38	pQTL
MIP1b	rs7222922	17	34335694	T	C	0.113	0.014	8.4e-16	0.003	32.979	pQTL
MIP1b	rs4795105	17	34287751	A	T	-0.106	0.0121	2.3e-18	0.003	35.401	pQTL
MIP1b	rs62079582	17	34813754	A	G	0.091	0.0207	1.2e-05	0.003	39.471	pQTL
MIP1b	rs2376468	17	34461903	C	G	-0.116	0.0139	4.6e-17	0.005	55.589	pQTL
MIP1b	rs117010890	17	34916971	T	C	-0.204	0.0259	3.2e-15	0.006	64.467	pQTL
MIP1b	rs12600678	17	34478231	T	C	0.184	0.0206	3.7e-19	0.007	80.796	pQTL
MIP1b	rs187348776	17	34535622	A	T	0.168	0.028	2e-09	0.007	84.437	pQTL
MIP1b	rs4795112	17	34471404	T	G	0.165	0.024	5.6e-12	0.007	86.373	pQTL
MIP1b	rs868340	17	34832620	A	T	-0.148	0.0078	3.6e-80	0.011	125.847	pQTL
MIP1b	rs200975376	17	34539235	A	G	0.214	0.0354	1.6e-09	0.011	133.031	pQTL
MIP1b	rs8064426	17	34819750	A	G	-0.452	0.0116	0	0.06	738.057	pQTL
PDGFbb	rs5757272	22	39157384	A	G	-0.045	0.0113	7.8e-05	0.001	18.206	pQTL
RANTES	rs2251660	17	34252537	C	A	-0.183	0.0356	2.6e-07	0.009	31.347	pQTL
SCF	rs78628275	12	89078733	T	C	-0.11	0.0264	3.3e-05	0.001	20.916	pQTL
SCF	rs11608458	12	89369806	T	C	-0.07	0.012	5.9e-09	0.002	33.258	pQTL
SCF	rs11105125	12	89376538	T	C	-0.066	0.0116	1.4e-08	0.002	36.417	pQTL
SCGFb	rs35886564	19	51283589	T	C	-0.106	0.0248	1.8e-05	0.005	38.162	pQTL
SCGFb	rs62112533	19	51233758	T	C	-0.169	0.028	1.5e-09	0.011	75.272	pQTL
SeSelectin	rs60425295	1	169716281	T	C	0.104	0.0252	3.9e-05	0.003	58.091	pQTL
SeSelectin	rs3917412	1	169700502	T	C	0.115	0.0219	1.3e-07	0.005	124.215	pQTL
sICAM	rs57547494	19	10852417	T	C	0.143	0.0359	6.7e-05	0.002	10.232	pQTL
sICAM	rs78301903	19	10866888	C	T	0.144	0.0363	7.5e-05	0.002	10.301	pQTL
sICAM	rs62131898	19	10626428	G	A	0.125	0.0268	3.2e-06	0.003	18.011	pQTL
sICAM	rs62130043	19	10821054	G	A	0.086	0.0211	4.4e-05	0.003	18.186	pQTL
sICAM	rs74827019	19	10403603	T	C	0.176	0.0419	2.7e-05	0.004	18.331	pQTL
sICAM	rs78256348	19	10691307	T	C	0.1	0.0227	1.1e-05	0.004	18.359	pQTL
sICAM	rs139790375	19	10126107	T	C	0.117	0.0241	1.3e-06	0.004	18.727	pQTL
sICAM	rs7250419	19	10127126	G	A	0.102	0.0259	8.9e-05	0.004	18.935	pQTL
sICAM	rs112917725	19	10232339	T	C	0.165	0.036	4.7e-06	0.004	19.798	pQTL
sICAM	rs34196120	19	10117420	C	T	0.093	0.0196	2.4e-06	0.004	22.36	pQTL
sICAM	rs1988068	19	10330012	A	G	-0.113	0.0232	9.9e-07	0.005	24.645	pQTL
sICAM	rs73013009	19	10240241	A	T	0.199	0.0458	1.4e-05	0.005	25.346	pQTL
sICAM	rs142673551	19	9935851	T	C	-0.226	0.0434	1.8e-07	0.006	30.505	pQTL
sICAM	rs11085580	19	10214589	A	T	0.137	0.025	3.9e-08	0.007	34.021	pQTL
sICAM	rs5030347	19	10384604	A	C	-0.143	0.0245	6.3e-09	0.007	34.252	pQTL
sICAM	rs8111930	19	10368050	G	A	-0.254	0.0349	3e-13	0.008	41.522	pQTL
sICAM	rs112023341	19	10696691	A	G	-0.247	0.0412	2.1e-09	0.008	41.937	pQTL
sICAM	rs78671428	19	10707400	T	G	-0.256	0.0419	9.2e-10	0.008	42.261	pQTL
sICAM	rs5498	19	10395683	G	A	0.127	0.0197	9e-11	0.008	42.454	pQTL
sICAM	rs5030390	19	10382537	A	G	-0.294	0.0453	9.3e-11	0.008	43.298	pQTL
sICAM	rs7256672	19	10579474	G	T	-0.146	0.0215	1.1e-11	0.01	53.439	pQTL
sICAM	rs56114795	19	10868545	T	C	-0.3	0.0487	7.7e-10	0.011	57.908	pQTL
sICAM	rs7252897	19	10540971	T	C	0.211	0.0244	5.3e-18	0.013	68.427	pQTL
sICAM	rs12720234	19	10482859	T	C	-0.345	0.0463	8.7e-14	0.014	71.602	pQTL
sICAM	rs117063573	19	10835620	A	G	-0.434	0.0577	5.1e-14	0.018	95.74	pQTL
sVCAM	rs3917010	1	101190866	C	A	-0.098	0.0232	2.1e-05	0.003	15.658	pQTL
TNF-A	rs2429642	6	31486962	A	G	-0.077	0.0194	8e-05	0.002	13.873	pQTL
TNF-A	rs115497794	6	31328974	A	G	0.126	0.0291	1.4e-05	0.003	23.646	pQTL
TRAIL	rs76344120	3	172192313	T	C	-0.082	0.0001	0	0.001	11.388	pQTL
TRAIL	rs234060	3	172295283	T	C	-0.074	0.0187	8.7e-05	0.002	24.76	pQTL
TRAIL	rs16845310	3	172020156	A	G	-0.078	0.0181	1.5e-05	0.002	25.928	pQTL
TRAIL	rs9849338	3	172126476	A	C	-0.077	0.0162	2.2e-06	0.003	29.337	pQTL
TRAIL	rs13327037	3	172262296	A	G	-0.133	0.0216	9.3e-10	0.004	45.55	pQTL
TRAIL	rs9872638	3	172266364	A	G	-0.155	0.0227	7.5e-12	0.005	55.782	pQTL
TRAIL	rs13074711	3	172267803	T	C	0.156	0.0227	6.4e-12	0.005	56.578	pQTL
VEGF	rs7763358	6	44139869	T	C	0.058	0.0143	5.1e-05	0	13.628	pQTL
VEGF	rs34644314	6	43888210	C	G	0.068	0.0163	2.9e-05	0.001	15.796	pQTL
VEGF	rs9381291	6	44105715	T	G	0.038	0.0086	8.6e-06	0.001	20.333	pQTL
VEGF	rs7761137	6	44151490	A	G	0.045	0.0098	3.6e-06	0.001	21.36	pQTL
VEGF	rs1128930	6	44200325	A	C	-0.04	0.0087	3.5e-06	0.001	22.751	pQTL
VEGF	rs2782256	6	43688343	A	G	0.041	0.0087	2e-06	0.001	24.279	pQTL
VEGF	rs7765264	6	43974807	A	G	0.087	0.0155	2e-08	0.001	26.187	pQTL
VEGF	rs77518248	6	44087957	T	C	0.099	0.018	3.6e-08	0.001	28.407	pQTL
VEGF	rs9462937	6	43846430	T	G	0.048	0.0101	2.1e-06	0.001	28.699	pQTL
VEGF	rs9472153	6	43882612	A	G	0.045	0.0087	2.9e-07	0.001	29.27	pQTL
VEGF	rs9394981	6	44008747	A	G	0.048	0.0088	5e-08	0.001	31.243	pQTL
VEGF	rs72863966	6	43872093	A	C	-0.064	0.0095	2e-11	0.002	47.153	pQTL
VEGF	rs12214523	6	43939958	T	C	0.056	0.0086	5.4e-11	0.002	47.604	pQTL
VEGF	rs17209449	6	43935267	C	G	-0.124	0.0141	2.2e-18	0.002	63.799	pQTL
VEGF	rs1631155	6	43951967	A	G	0.087	0.0097	3.3e-19	0.003	78.696	pQTL
VEGF	rs62401231	6	43898150	A	G	0.079	0.0088	5.1e-19	0.003	83.252	pQTL
VEGF	rs75116661	6	43925775	A	C	-0.146	0.017	1.1e-17	0.004	117.992	pQTL
VEGF	rs80075573	6	43924058	A	T	0.164	0.0159	5.3e-25	0.004	120.591	pQTL
VEGF	rs78135777	6	43933264	A	G	0.225	0.0194	3.6e-31	0.006	165.808	pQTL
VEGF	rs9381268	6	43933895	T	C	0.111	0.0126	1.3e-18	0.006	172.71	pQTL
VEGF	rs4349808	6	43924774	T	C	0.262	0.0084	2e-212	0.034	1048.07	pQTL

## Sheet: S3 Table
S3 Table. Details of the GWASs for outcomes
Consortium	Phenotype	Cases	Controls	Year	Dataset	Web Source	Population
UK Biobank	Sepsis	11643	474841	2021	ieu-b-4980	https://gwas.mrcieu.ac.uk/datasets/ieu-b-4980/	European
UK Biobank	Sepsis (critical care)	1380	429985	2021	ieu-b-4982	https://gwas.mrcieu.ac.uk/datasets/ieu-b-4982/	European
UK Biobank	Sepsis (28 day death)	1896	484588	2021	ieu-b-5086	https://gwas.mrcieu.ac.uk/datasets/ieu-b-5086/	European
UK Biobank	Sepsis (28 day death in critical care)	347	431018	2021	ieu-b-4981	https://gwas.mrcieu.ac.uk/datasets/ieu-b-4981/	European

## Sheet: S4 Table
S4 Table. Antibody information
Antibodies	Source	Identifier (Catalog #)
Anti-Caspase 1	Proteintech	Cat# 22915-1-AP
Anti-Total and Cleaved IL1b	Abmart	Cat# P50520-1R1S
Anti-CCL4	Bioss	Cat# bs-1046R
Anti-Beta Actin	Proteintech	Cat# 66009-1-Ig

## Sheet: S5 Table
S5 Table. List of qPCR primers
Gene	Forward	Reverse
Rat-CCL4	TCC CAC TTC CTG CTG CTT CTC	AGG CTG CTG GTC TCA TAG TAA TCC

## Sheet: S6 Table
S6 Table. Summary of the discovery stage findings based on the inverse variance-weighted or Wald ratio method
id.exposure	id.outcome	outcome	method	nsnp	b	se	pval	qvalue_FDR
MIP1b	ieu-b-4982	Sepsis (critical care)	Inverse variance weighted	17	-0.361079	0.0950466	0.000145301	0.0168549
activePAI	ieu-b-4982	Sepsis (critical care)	Wald ratio	1	-1.70443	0.501378	0.0006751	0.0391558
MIP1a	ieu-b-4980	Sepsis	Inverse variance weighted	26	-0.0721034	0.024084	0.00275495	0.106525
MIP1a	ieu-b-5086	Sepsis (28 day death)	Inverse variance weighted	26	-0.167131	0.0587743	0.00446068	0.12936
TRAIL	ieu-b-4980	Sepsis	Inverse variance weighted	7	-0.161942	0.0758968	0.0328662	0.568246
IL-1ra	ieu-b-4982	Sepsis (critical care)	Inverse variance weighted	14	0.218234	0.106381	0.0402244	0.568246
sVCAM	ieu-b-4982	Sepsis (critical care)	Wald ratio	1	-1.01468	0.495815	0.0407089	0.568246
IL12p70	ieu-b-5086	Sepsis (28 day death)	Wald ratio	1	0.844798	0.415869	0.0422139	0.568246
activePAI	ieu-b-4981	Sepsis (28 day death in critical care)	Wald ratio	1	-2.02501	1.00584	0.044088	0.568246
IL-6	ieu-b-4981	Sepsis (28 day death in critical care)	Wald ratio	1	-2.66767	1.36662	0.0509361	0.590859
IL-1ra	ieu-b-4981	Sepsis (28 day death in critical care)	Inverse variance weighted	14	0.431042	0.228734	0.0595024	0.62748
MCSF	ieu-b-4982	Sepsis (critical care)	Inverse variance weighted	13	0.260513	0.149333	0.0810696	0.783673
Eotaxin	ieu-b-4981	Sepsis (28 day death in critical care)	Inverse variance weighted	5	-0.813135	0.502741	0.105791	0.822954
IL-6	ieu-b-4982	Sepsis (critical care)	Wald ratio	1	-1.08186	0.680343	0.111796	0.822954
IL-2ra	ieu-b-4981	Sepsis (28 day death in critical care)	Inverse variance weighted	9	0.232711	0.147893	0.1156	0.822954
MCP3	ieu-b-5086	Sepsis (28 day death)	Inverse variance weighted	10	0.0765189	0.0492581	0.12032	0.822954
MIP1b	ieu-b-4981	Sepsis (28 day death in critical care)	Inverse variance weighted	17	-0.302676	0.200803	0.131725	0.822954
SeSelectin	ieu-b-4981	Sepsis (28 day death in critical care)	Inverse variance weighted	2	-0.981939	0.653318	0.132838	0.822954
IL12p70	ieu-b-4980	Sepsis	Wald ratio	1	0.255324	0.170733	0.134794	0.822954
GROa	ieu-b-4980	Sepsis	Inverse variance weighted	11	-0.0270702	0.0185068	0.143546	0.832566
IL-18	ieu-b-4980	Sepsis	Inverse variance weighted	4	0.0705351	0.0509686	0.166391	0.912796
sICAM	ieu-b-5086	Sepsis (28 day death)	Inverse variance weighted	23	0.088696	0.0658809	0.178203	0.912796
activePAI	ieu-b-4980	Sepsis	Wald ratio	1	-0.232153	0.175042	0.184752	0.912796
GROa	ieu-b-4981	Sepsis (28 day death in critical care)	Inverse variance weighted	11	0.176905	0.134633	0.188854	0.912796
MIP1a	ieu-b-4981	Sepsis (28 day death in critical care)	Inverse variance weighted	26	0.177125	0.138467	0.200834	0.915474
VEGF	ieu-b-4980	Sepsis	Inverse variance weighted	18	0.048024	0.0404034	0.234592	0.915474
MCP3	ieu-b-4981	Sepsis (28 day death in critical care)	Inverse variance weighted	10	0.137465	0.116005	0.236019	0.915474
VEGF	ieu-b-4982	Sepsis (critical care)	Inverse variance weighted	18	0.127767	0.108694	0.239805	0.915474
sICAM	ieu-b-4980	Sepsis	Inverse variance weighted	23	0.0377715	0.0324682	0.244692	0.915474
TNF-A	ieu-b-4980	Sepsis	Inverse variance weighted	2	-0.175121	0.15894	0.270547	0.915474
MCSF	ieu-b-5086	Sepsis (28 day death)	Inverse variance weighted	13	-0.120769	0.110877	0.27606	0.915474
SCGFb	ieu-b-4980	Sepsis	Inverse variance weighted	2	-0.0877704	0.0814002	0.280919	0.915474
IL-7	ieu-b-5086	Sepsis (28 day death)	Wald ratio	1	-0.371304	0.356652	0.297837	0.915474
TRAIL	ieu-b-4981	Sepsis (28 day death in critical care)	Inverse variance weighted	7	-0.388613	0.381692	0.308615	0.915474
MIP1a	ieu-b-4982	Sepsis (critical care)	Inverse variance weighted	26	0.0701711	0.0691479	0.310203	0.915474
Eotaxin	ieu-b-4982	Sepsis (critical care)	Inverse variance weighted	5	-0.27796	0.282559	0.325251	0.915474
GROa	ieu-b-5086	Sepsis (28 day death)	Inverse variance weighted	11	-0.0451993	0.0462203	0.328119	0.915474
MIG	ieu-b-4980	Sepsis	Wald ratio	1	0.0925909	0.0970305	0.33996	0.915474
RANTES	ieu-b-4981	Sepsis (28 day death in critical care)	Wald ratio	1	0.548186	0.605437	0.365233	0.915474
PDGFbb	ieu-b-4982	Sepsis (critical care)	Wald ratio	1	0.784469	0.886722	0.376327	0.915474
SeSelectin	ieu-b-5086	Sepsis (28 day death)	Inverse variance weighted	2	-0.340611	0.405352	0.400749	0.915474
IP-10	ieu-b-4980	Sepsis	Inverse variance weighted	5	-0.0615197	0.0733034	0.40133	0.915474
IL12p70	ieu-b-4981	Sepsis (28 day death in critical care)	Wald ratio	1	0.821765	0.982336	0.402851	0.915474
MCP3	ieu-b-4982	Sepsis (critical care)	Inverse variance weighted	10	0.0473278	0.0579114	0.413789	0.915474
IL-8	ieu-b-4980	Sepsis	Wald ratio	1	-0.129453	0.158818	0.415011	0.915474
Eotaxin	ieu-b-5086	Sepsis (28 day death)	Inverse variance weighted	5	-0.172848	0.213124	0.417353	0.915474
MCSF	ieu-b-4981	Sepsis (28 day death in critical care)	Inverse variance weighted	13	-0.217927	0.270437	0.420339	0.915474
RANTES	ieu-b-4980	Sepsis	Wald ratio	1	-0.0832104	0.104951	0.427867	0.915474
PDGFbb	ieu-b-4980	Sepsis	Wald ratio	1	0.240218	0.308673	0.436435	0.915474
SCGFb	ieu-b-4981	Sepsis (28 day death in critical care)	Inverse variance weighted	2	0.624317	0.803411	0.43711	0.915474
HGF	ieu-b-4981	Sepsis (28 day death in critical care)	Wald ratio	1	0.404262	0.526143	0.442279	0.915474
Eotaxin	ieu-b-4980	Sepsis	Inverse variance weighted	5	0.0652849	0.0873525	0.454839	0.915474
HGF	ieu-b-5086	Sepsis (28 day death)	Wald ratio	1	0.166417	0.223119	0.455746	0.915474
CTACK	ieu-b-5086	Sepsis (28 day death)	Inverse variance weighted	3	0.0955658	0.133226	0.473176	0.915474
MIP1b	ieu-b-4980	Sepsis	Inverse variance weighted	17	-0.0236189	0.0331727	0.476466	0.915474
SCGFb	ieu-b-4982	Sepsis (critical care)	Inverse variance weighted	2	0.214468	0.308107	0.486377	0.915474
SCGFb	ieu-b-5086	Sepsis (28 day death)	Inverse variance weighted	2	-0.31789	0.461339	0.490786	0.915474
IP-10	ieu-b-4982	Sepsis (critical care)	Inverse variance weighted	5	0.218116	0.320149	0.495683	0.915474
sVCAM	ieu-b-4981	Sepsis (28 day death in critical care)	Wald ratio	1	-0.672307	0.998815	0.500881	0.915474
HGF	ieu-b-4982	Sepsis (critical care)	Wald ratio	1	0.175092	0.260347	0.501243	0.915474
MIG	ieu-b-5086	Sepsis (28 day death)	Wald ratio	1	-0.158623	0.236471	0.502353	0.915474
MIG	ieu-b-4981	Sepsis (28 day death in critical care)	Wald ratio	1	-0.366254	0.559925	0.51304	0.915474
MIP1b	ieu-b-5086	Sepsis (28 day death)	Inverse variance weighted	17	0.05136	0.0810053	0.526059	0.915474
MIG	ieu-b-4982	Sepsis (critical care)	Wald ratio	1	-0.175245	0.278065	0.528544	0.915474
IP-10	ieu-b-5086	Sepsis (28 day death)	Inverse variance weighted	5	0.135011	0.216363	0.532628	0.915474
sVCAM	ieu-b-4980	Sepsis	Wald ratio	1	0.10734	0.172669	0.534173	0.915474
IL-16	ieu-b-4982	Sepsis (critical care)	Inverse variance weighted	6	0.147581	0.255441	0.563433	0.915474
sICAM	ieu-b-4981	Sepsis (28 day death in critical care)	Inverse variance weighted	23	-0.0923863	0.170953	0.588908	0.915474
sVCAM	ieu-b-5086	Sepsis (28 day death)	Wald ratio	1	0.227864	0.421968	0.589195	0.915474
TNF-A	ieu-b-4982	Sepsis (critical care)	Inverse variance weighted	2	-0.240923	0.449014	0.591571	0.915474
IL-18	ieu-b-5086	Sepsis (28 day death)	Inverse variance weighted	4	0.05709	0.107545	0.595525	0.915474
SeSelectin	ieu-b-4982	Sepsis (critical care)	Inverse variance weighted	2	-0.263676	0.51162	0.606291	0.915474
MCSF	ieu-b-4980	Sepsis	Inverse variance weighted	13	0.0232116	0.0454183	0.609307	0.915474
IL-2ra	ieu-b-5086	Sepsis (28 day death)	Inverse variance weighted	9	0.0379471	0.0760743	0.617909	0.915474
sICAM	ieu-b-4982	Sepsis (critical care)	Inverse variance weighted	23	0.0424815	0.0858126	0.620565	0.915474
IL-7	ieu-b-4980	Sepsis	Wald ratio	1	0.0705543	0.146061	0.629063	0.915474
MCP3	ieu-b-4980	Sepsis	Inverse variance weighted	10	-0.00943967	0.0201904	0.640119	0.915474
CTACK	ieu-b-4982	Sepsis (critical care)	Inverse variance weighted	3	-0.0554541	0.120166	0.644454	0.915474
IL-6	ieu-b-4980	Sepsis	Wald ratio	1	-0.108249	0.237648	0.648747	0.915474
HGF	ieu-b-4980	Sepsis	Wald ratio	1	0.0415429	0.0913684	0.649344	0.915474
IL-18	ieu-b-4982	Sepsis (critical care)	Inverse variance weighted	4	0.0572073	0.126469	0.651021	0.915474
IL-16	ieu-b-4981	Sepsis (28 day death in critical care)	Inverse variance weighted	6	0.226766	0.511188	0.657327	0.915474
IL-8	ieu-b-4982	Sepsis (critical care)	Wald ratio	1	-0.198138	0.45542	0.663514	0.915474
SeSelectin	ieu-b-4980	Sepsis	Inverse variance weighted	2	0.0843961	0.19845	0.670635	0.915474
IL-2ra	ieu-b-4980	Sepsis	Inverse variance weighted	9	0.0107154	0.0257639	0.677478	0.915474
IL-16	ieu-b-5086	Sepsis (28 day death)	Inverse variance weighted	6	-0.119047	0.308993	0.700033	0.915474
SCF	ieu-b-4980	Sepsis	Inverse variance weighted	3	0.0500249	0.131415	0.703452	0.915474
IL-8	ieu-b-5086	Sepsis (28 day death)	Wald ratio	1	-0.147074	0.388865	0.705272	0.915474
IP-10	ieu-b-4981	Sepsis (28 day death in critical care)	Inverse variance weighted	5	0.159613	0.424392	0.706844	0.915474
IL12p70	ieu-b-4982	Sepsis (critical care)	Wald ratio	1	-0.180651	0.489267	0.711958	0.915474
IL-8	ieu-b-4981	Sepsis (28 day death in critical care)	Wald ratio	1	-0.330768	0.916505	0.718174	0.915474
PDGFbb	ieu-b-5086	Sepsis (28 day death)	Wald ratio	1	0.252207	0.753896	0.737974	0.923764
PDGFbb	ieu-b-4981	Sepsis (28 day death in critical care)	Wald ratio	1	0.586364	1.77121	0.740604	0.923764
GROa	ieu-b-4982	Sepsis (critical care)	Inverse variance weighted	11	0.0189737	0.0654565	0.771918	0.931931
IL-1ra	ieu-b-4980	Sepsis	Inverse variance weighted	14	0.0104893	0.037057	0.777133	0.931931
SCF	ieu-b-4982	Sepsis (critical care)	Inverse variance weighted	3	0.104131	0.377546	0.782693	0.931931
TRAIL	ieu-b-4982	Sepsis (critical care)	Inverse variance weighted	7	0.0523859	0.190552	0.78338	0.931931
IL-7	ieu-b-4982	Sepsis (critical care)	Wald ratio	1	0.112636	0.418932	0.788034	0.931931
RANTES	ieu-b-5086	Sepsis (28 day death)	Wald ratio	1	0.0662973	0.255616	0.795355	0.931931
IL-7	ieu-b-4981	Sepsis (28 day death in critical care)	Wald ratio	1	0.180104	0.840574	0.830342	0.963197
IL-1ra	ieu-b-5086	Sepsis (28 day death)	Inverse variance weighted	14	-0.0151828	0.0904986	0.866765	0.96757
VEGF	ieu-b-4981	Sepsis (28 day death in critical care)	Inverse variance weighted	18	-0.044244	0.264347	0.867078	0.96757
CTACK	ieu-b-4981	Sepsis (28 day death in critical care)	Inverse variance weighted	3	-0.039204	0.241638	0.871115	0.96757
SCF	ieu-b-4981	Sepsis (28 day death in critical care)	Inverse variance weighted	3	0.117746	0.755841	0.876206	0.96757
IL-16	ieu-b-4980	Sepsis	Inverse variance weighted	6	0.0135556	0.0891162	0.879099	0.96757
activePAI	ieu-b-5086	Sepsis (28 day death)	Wald ratio	1	0.055801	0.426914	0.896006	0.96757
TNF-A	ieu-b-5086	Sepsis (28 day death)	Inverse variance weighted	2	0.0484428	0.383044	0.899361	0.96757
TNF-A	ieu-b-4981	Sepsis (28 day death in critical care)	Inverse variance weighted	2	0.169817	1.40831	0.904022	0.96757
IL-18	ieu-b-4981	Sepsis (28 day death in critical care)	Inverse variance weighted	4	0.0382362	0.335201	0.909183	0.96757
TRAIL	ieu-b-5086	Sepsis (28 day death)	Inverse variance weighted	7	0.015378	0.162155	0.924446	0.97487
IL-2ra	ieu-b-4982	Sepsis (critical care)	Inverse variance weighted	9	0.00600039	0.0739024	0.935288	0.977418
SCF	ieu-b-5086	Sepsis (28 day death)	Inverse variance weighted	3	0.0201662	0.320556	0.949838	0.983761
RANTES	ieu-b-4982	Sepsis (critical care)	Wald ratio	1	-0.00352389	0.301366	0.99067	0.999661
CTACK	ieu-b-4980	Sepsis	Inverse variance weighted	3	-0.000474495	0.0418695	0.990958	0.999661
VEGF	ieu-b-5086	Sepsis (28 day death)	Inverse variance weighted	18	0.000828019	0.0978783	0.99325	0.999661
IL-6	ieu-b-5086	Sepsis (28 day death)	Wald ratio	1	-0.000246944	0.5809	0.999661	0.999661

## Sheet: S7 Table
S7 Table. Genetic instruments of sepsis requiring critical care for bidirectional MR
SNP	chr.exposure	pos.exposure	effect_allele.exposure	other_allele.exposure	beta.exposure	se.exposure	pval.exposure	samplesize.exposure	eaf.exposure
rs114688649	1	152832831	G	A	0.57298	0.158958	0.00031263	431365	0.0157046
rs112322749	1	74170117	T	G	0.489842	0.136679	0.000338524	431365	0.0229006
rs116964879	1	108614403	A	G	0.740887	0.197246	0.000172548	431365	0.0105806
rs12744615	1	12167431	A	G	-0.212257	0.0604755	0.000448446	431365	0.127727
rs149183900	1	22107267	A	G	-0.732446	0.188139	9.89624e-05	431365	0.0115485
rs79186011	1	145503910	T	C	-0.251147	0.071869	0.00047493	431365	0.0836249
rs114218896	1	248193804	A	G	-0.681091	0.195072	0.000480341	431365	0.0102515
rs113008968	1	210595076	G	A	-0.171275	0.0477255	0.000332269	431365	0.214844
rs72742475	1	218879783	T	C	-0.468545	0.132629	0.000411254	431365	0.0225573
rs149106381	1	224643268	A	G	-0.743711	0.160754	3.72083e-06	431365	0.0158476
rs1621135	1	231664753	A	T	0.22649	0.0614795	0.000229615	431365	0.1147
rs2841852	1	142632515	G	T	-0.218106	0.0580465	0.000171668	431365	0.501
rs10494315	1	157259881	G	C	0.167473	0.0408588	4.15241e-05	431365	0.632157
rs35041309	1	87214269	A	T	0.26853	0.0736877	0.000268263	431365	0.077252
rs11577931	1	109820884	G	A	-0.255718	0.0682594	0.000179482	431365	0.0899611
rs2802844	1	204979752	A	G	0.220913	0.0605908	0.000266373	431365	0.12594
rs13376368	1	171047415	G	T	-0.165322	0.0471681	0.000456688	431365	0.229362
rs112075844	1	188434196	C	T	0.716265	0.202801	0.000412658	431365	0.0104788
rs144357573	1	221572085	A	G	0.884116	0.214575	3.78373e-05	431365	0.0103733
rs140550412	1	26990107	A	G	0.291577	0.0805538	0.000294992	431365	0.0634235
rs143275045	1	2458010	C	G	-0.418524	0.117498	0.000368095	431365	0.0287126
rs144796345	1	63781944	G	C	0.516517	0.126661	4.54349e-05	431365	0.0259355
rs75527787	1	53988977	A	G	0.454454	0.125331	0.000287813	431365	0.0262811
rs115051725	1	63491739	G	A	-0.240434	0.0682026	0.000423019	431365	0.0964075
rs113616691	1	206771341	A	G	0.494593	0.124048	6.6879e-05	431365	0.0259622
rs145222622	1	207602597	A	G	-0.444591	0.113372	8.79934e-05	431365	0.0314229
rs116253217	1	183337883	C	T	0.587608	0.168535	0.00048926	431365	0.0141252
rs12126166	1	187760295	A	G	-0.336691	0.0772315	1.30359e-05	431365	0.0713374
rs10753989	1	191604955	C	T	0.176796	0.0484981	0.000266956	431365	0.207981
rs1199574	1	101996808	G	A	-0.140616	0.0393141	0.00034792	431365	0.51814
rs36054887	1	107888185	G	A	0.440205	0.108553	5.0091e-05	431365	0.0340421
rs530448975	1	108990774	G	T	-0.703613	0.177523	7.38567e-05	431365	0.0182453
rs151312922	1	158131789	A	G	0.73715	0.207686	0.000386189	431365	0.00948098
rs6668756	1	169459817	T	C	-0.174437	0.0489691	0.00036779	431365	0.790797
rs3753658	1	226012686	T	G	0.205758	0.0579105	0.000380811	431365	0.13255
rs150312146	1	231967871	G	C	0.426048	0.109915	0.000106113	431365	0.0327898
rs9436601	1	60194899	C	T	0.18192	0.0516266	0.000425481	431365	0.190785
rs111865760	1	9492541	C	T	-0.558867	0.135938	3.93632e-05	431365	0.021858
rs77496449	1	9971492	T	G	-0.664481	0.188427	0.000421134	431365	0.0133246
rs12127699	1	17923518	A	G	-0.32617	0.0837504	9.83807e-05	431365	0.0583416
rs1702088	1	20347278	T	G	-0.158754	0.0450764	0.00042847	431365	0.254376
rs6669259	1	240751389	T	A	-0.182456	0.0505036	0.000302991	431365	0.192561
rs532849346	1	174203646	G	A	0.630488	0.169043	0.000191677	431365	0.0184558
rs12126570	1	195929779	C	G	0.773858	0.178649	1.47948e-05	431365	0.0133663
rs28720982	1	203550701	C	A	0.713397	0.188761	0.000157224	431365	0.010801
rs115167413	1	205018642	G	C	-0.841805	0.236302	0.000367468	431365	0.00734128
rs34285465	1	210439000	T	G	0.247411	0.0699154	0.000402087	431365	0.0876588
rs2144276	1	228904611	T	C	0.373286	0.103031	0.000291172	431365	0.0381438
rs115626909	1	246701666	G	A	0.840276	0.20538	4.28914e-05	431365	0.00940546
rs2494626	1	2404256	T	C	0.193712	0.0478075	5.08007e-05	431365	0.285899
rs78637350	1	19798487	G	A	0.48856	0.132747	0.000232879	431365	0.0226379
rs78382935	1	76897488	T	G	-1.12937	0.248469	5.48479e-06	431365	0.00703795
rs191441333	1	153039656	A	G	-0.84007	0.235899	0.000369241	431365	0.00743639
rs186779340	1	165087494	A	G	0.594705	0.165697	0.00033181	431365	0.0157309
rs116290371	1	115571390	T	C	0.89471	0.198296	6.422e-06	431365	0.0105153
rs116469288	2	98746768	T	C	-0.374709	0.107042	0.000464259	431365	0.0354611
rs10167502	2	38053726	T	A	0.398705	0.102273	9.68122e-05	431365	0.0384375
rs115210029	2	42052108	G	A	-0.382513	0.108075	0.000401125	431365	0.034819
rs2222316	2	50443675	C	T	-0.362251	0.10264	0.000416582	431365	0.0384827
rs7560412	2	136485096	T	C	0.325128	0.0824939	8.10625e-05	431365	0.062613
rs55686536	2	9527309	C	T	0.495688	0.139057	0.000364359	431365	0.0232533
rs75686775	2	207574498	A	G	-0.254529	0.0684799	0.00020173	431365	0.0907472
rs4832602	2	18713455	A	G	0.15527	0.0425667	0.000264624	431365	0.692203
rs141941174	2	242139102	A	G	0.540475	0.144207	0.000178304	431365	0.0195096
rs62187062	2	197201273	G	A	-0.337652	0.0921077	0.00024653	431365	0.0478138
rs72875985	2	169417422	T	C	0.676904	0.177696	0.000139345	431365	0.0128678
rs6605276	2	1294086	G	A	0.140619	0.0394648	0.000366438	431365	0.515252
rs1729084	2	232145852	A	G	0.156914	0.0433429	0.000294266	431365	0.287449
rs7349262	2	218243027	G	A	-0.163693	0.0413513	7.53911e-05	431365	0.647641
rs146319836	2	34627423	A	G	-0.760248	0.203348	0.000185012	431365	0.0100787
rs62140434	2	65362233	G	A	0.185542	0.0527517	0.000436004	431365	0.167497
rs11548393	2	65539641	T	C	-0.158855	0.0400192	7.20344e-05	431365	0.400683
rs76381771	2	74824399	T	C	-0.335267	0.090819	0.000222854	431365	0.0490146
rs17019259	2	80740330	T	A	-0.146776	0.0412079	0.000368273	431365	0.428656
rs116814093	2	97497050	C	G	-0.535884	0.152351	0.000435743	431365	0.0195218
rs115310405	2	170386927	A	G	0.611529	0.156666	9.48506e-05	431365	0.0182307
rs2376070	2	104646414	C	T	-0.184224	0.0519487	0.000390715	431365	0.805801
rs6727399	2	132650557	C	T	-0.173481	0.0408823	2.20125e-05	431365	0.431371
rs17629193	2	7406992	T	C	-0.16055	0.0438202	0.000248468	431365	0.290085
rs2052278	2	51563145	A	G	0.155882	0.043656	0.000356057	431365	0.719666
rs114943944	2	158560709	G	A	0.305845	0.0786025	9.98206e-05	431365	0.0666955
rs59916403	2	242370751	T	G	-0.170239	0.0411088	3.45541e-05	431365	0.351699
rs149304975	2	214189122	C	T	0.87537	0.242483	0.000306161	431365	0.00774725
rs111251048	2	207288017	A	G	0.334811	0.0897786	0.000192017	431365	0.0556702
rs28704637	2	20359739	G	C	0.317056	0.0897186	0.000409477	431365	0.0513364
rs11125726	2	57906836	C	T	-0.19412	0.0503898	0.000116982	431365	0.188344
rs552682551	2	5958031	T	C	-0.284981	0.0812739	0.000454161	431365	0.0852479
rs115627185	2	35685826	T	G	-0.452413	0.127011	0.000368044	431365	0.0242701
rs79279302	2	183118354	G	C	0.218297	0.0590161	0.000216501	431365	0.12622
rs78696503	2	200059212	G	A	-0.234842	0.0564132	3.14239e-05	431365	0.143338
rs114292534	2	19284942	T	C	-0.681325	0.188826	0.000308312	431365	0.0112337
rs116809988	2	109702390	T	C	-0.343423	0.0920788	0.00019173	431365	0.050733
rs10176993	2	122570868	T	A	0.170887	0.0446253	0.000128464	431365	0.270827
rs1548976	2	75384126	T	C	0.145111	0.0397903	0.000265442	431365	0.54217
rs78233244	2	76797521	T	C	-0.433625	0.119739	0.000293008	431365	0.0277485
rs59825798	2	111984952	C	G	0.517812	0.14275	0.000286293	431365	0.0193787
rs75386719	2	233887456	T	C	-0.51073	0.127318	6.03434e-05	431365	0.0251265
rs114583226	2	236263914	A	C	0.530321	0.0982385	6.72744e-08	431365	0.042588
rs140725786	2	234307034	T	G	-0.95925	0.252255	0.000143126	431365	0.00634993
rs13419075	2	240581797	T	C	0.27707	0.0691084	6.09228e-05	431365	0.0971856
rs2541185	2	29979053	T	C	0.192889	0.0519838	0.000206805	431365	0.818
rs149478521	2	30306076	A	G	-1.26787	0.359859	0.000426285	431365	0.0033778
rs115095222	2	66744897	G	T	0.415573	0.118657	0.000461254	431365	0.0279724
rs146896032	2	106968562	A	G	-0.803392	0.20773	0.000109961	431365	0.00980991
rs62135509	2	46466854	T	C	0.262312	0.0709844	0.000219584	431365	0.0845541
rs55685154	2	242947985	G	A	0.153001	0.0429786	0.000370937	431365	0.357402
rs2264234	2	204389405	T	C	-0.508968	0.146152	0.000496855	431365	0.0189088
rs145877591	2	212847712	G	A	0.813503	0.190307	1.91408e-05	431365	0.0113111
rs2128394	2	213801183	G	A	0.157206	0.039932	8.25582e-05	431365	0.472891
rs7579300	2	216776774	A	C	0.166372	0.0409806	4.91191e-05	431365	0.644055
rs113303156	2	241948082	A	G	-0.472358	0.134258	0.00043435	431365	0.0246805
rs9287962	2	174206373	T	C	0.184178	0.0491984	0.000181422	431365	0.200949
rs72823560	2	51129069	A	G	0.424529	0.120526	0.000427819	431365	0.0270956
rs142442192	3	71319755	T	C	-0.63884	0.165824	0.000116904	431365	0.0154649
rs114657423	3	29316464	G	T	-0.508135	0.144164	0.000423975	431365	0.0203502
rs17201571	3	34568780	C	T	-0.240432	0.0636069	0.000156845	431365	0.107372
rs531998757	3	158816392	G	T	0.204185	0.0533014	0.00012775	431365	0.179323
rs59642441	3	11949157	A	G	0.146089	0.0419191	0.000492085	431365	0.323967
rs143927388	3	99347756	A	G	0.553321	0.153411	0.000310013	431365	0.0178922
rs6808294	3	102370320	G	A	0.347845	0.0921163	0.000159272	431365	0.942182
rs11710239	3	3068064	T	G	-0.340449	0.0966151	0.000425471	431365	0.0427459
rs6438766	3	122521576	A	G	0.146909	0.041499	0.000400028	431365	0.66684
rs115530322	3	2122268	G	T	0.434162	0.12101	0.000333449	431365	0.027448
rs9856820	3	190960888	A	C	-0.141637	0.0400327	0.000403116	431365	0.420875
rs190087247	3	181585007	C	T	0.807766	0.224167	0.000314073	431365	0.00854206
rs78012168	3	156150321	A	G	0.539567	0.14661	0.000232965	431365	0.0183852
rs779298	3	191494858	G	T	-0.145871	0.0400011	0.000265662	431365	0.403971
rs4263280	3	6739515	A	G	0.145242	0.039235	0.000214033	431365	0.498293
rs149164843	3	13349705	A	G	0.521213	0.134106	0.000101662	431365	0.0262437
rs116608545	3	16642875	C	T	0.69407	0.183225	0.00015182	431365	0.0121485
rs6785855	3	39853194	A	G	0.60742	0.172072	0.000415509	431365	0.0132058
rs77370513	3	46498360	T	G	-0.356774	0.0982313	0.000281248	431365	0.0421312
rs28716943	3	56869447	G	A	-0.249333	0.0591735	2.51345e-05	431365	0.131496
rs34425111	3	86247730	G	A	-0.204146	0.0572958	0.000366606	431365	0.137779
rs116165485	3	87641652	A	G	0.402239	0.11342	0.000390436	431365	0.0307423
rs4683050	3	45160668	G	A	0.53108	0.141809	0.000180368	431365	0.980509
rs17078339	3	45822437	G	A	-0.157036	0.0446254	0.000433221	431365	0.279671
rs1355550	3	62505489	A	G	0.939727	0.231869	5.05999e-05	431365	0.00739151
rs9865092	3	184327673	G	T	0.175614	0.0408846	1.74417e-05	431365	0.634613
rs77104037	3	126547641	A	G	0.598245	0.169755	0.000424805	431365	0.0140333
rs143812578	3	153785609	T	A	0.768519	0.193005	6.83786e-05	431365	0.0105656
rs62255713	3	78443790	A	C	0.456881	0.109981	3.26453e-05	431365	0.0327005
rs1038301	3	14427543	A	G	0.231852	0.0597689	0.000104829	431365	0.122874
rs7647470	3	6319263	G	C	-0.173697	0.0392848	9.80212e-06	431365	0.51093
rs13100516	3	6917094	T	C	-0.324286	0.0907008	0.000349784	431365	0.0532023
rs17049436	3	8707984	C	T	-0.168202	0.0468231	0.000327786	431365	0.227146
rs79454301	3	197558717	A	C	-0.361558	0.0806028	7.26842e-06	431365	0.0690895
rs146382910	3	108614879	T	G	-0.654815	0.18501	0.000401107	431365	0.0118983
rs74683490	3	114452130	G	A	0.357212	0.0974968	0.000248462	431365	0.042104
rs116058757	3	35814147	G	A	-0.686408	0.193431	0.000387284	431365	0.0105476
rs13078715	3	122367843	C	T	-0.218698	0.0604548	0.000297406	431365	0.133172
rs2175526	3	62609908	T	C	-0.465756	0.115457	5.48327e-05	431365	0.969283
rs113939253	3	157534236	A	T	0.493526	0.138189	0.000355075	431365	0.0218331
rs74809138	3	168861345	C	A	-0.659019	0.16962	0.000102216	431365	0.0133176
rs1968222	3	171256590	T	C	-0.565385	0.15725	0.000323825	431365	0.0159974
rs71312344	3	175552358	T	C	0.227089	0.064893	0.00046623	431365	0.102199
rs77270743	3	186605788	T	C	0.337913	0.0956912	0.000413542	431365	0.0454433
rs28677929	3	5791509	G	A	-0.188258	0.0484644	0.000102556	431365	0.204448
rs34230332	3	14725878	G	A	0.298446	0.0769491	0.000105107	431365	0.0699144
rs202052736	3	4963681	T	C	0.744914	0.211663	0.000432613	431365	0.0107786
rs76254034	3	14728339	T	C	-0.346001	0.0970247	0.00036231	431365	0.0427618
rs71323262	3	27182417	G	A	0.497014	0.126338	8.35391e-05	431365	0.0260251
rs34100264	3	35812622	A	G	-0.464683	0.115183	5.47633e-05	431365	0.0298859
rs141278796	3	44093069	A	G	-0.539017	0.150034	0.000327356	431365	0.0182864
rs17296363	3	59811713	C	T	-0.453489	0.107669	2.53239e-05	431365	0.035717
rs140892559	3	105615818	T	A	0.683811	0.173067	7.77857e-05	431365	0.0130694
rs78097678	3	78686926	A	C	-0.332688	0.0905876	0.000240138	431365	0.0492438
rs74428630	3	72343714	A	G	0.662676	0.185757	0.000360487	431365	0.0124448
rs74852239	3	195773550	A	G	-0.271509	0.0723688	0.000175618	431365	0.0847723
rs73172085	3	169121987	A	G	0.441608	0.126502	0.000481349	431365	0.0251685
rs56379638	4	166083293	C	T	0.709979	0.196343	0.000299164	431365	0.0112876
rs11730521	4	177559960	C	A	-0.554691	0.141531	8.88362e-05	431365	0.0196833
rs145407389	4	177755910	A	G	0.941495	0.229569	4.11131e-05	431365	0.00910895
rs1963897	4	178042789	T	C	-0.236479	0.065581	0.000311057	431365	0.898979
rs150070008	4	119509861	A	G	-0.840355	0.237928	0.000412477	431365	0.00841925
rs142805892	4	125720374	A	C	0.572451	0.154283	0.000206938	431365	0.0175242
rs77971527	4	6515891	T	C	0.555643	0.157052	0.000403246	431365	0.0161352
rs35914931	4	99614015	T	A	-0.152075	0.0412682	0.00022866	431365	0.356928
rs115834569	4	104896723	T	G	0.528562	0.131885	6.13028e-05	431365	0.0220838
rs6810472	4	184572934	C	T	0.156534	0.0432247	0.000293022	431365	0.395632
rs11132595	4	189923279	C	G	-0.183571	0.0497074	0.00022159	431365	0.208253
rs148722487	4	95941625	A	G	-0.812428	0.210779	0.000116009	431365	0.00938374
rs35212452	4	14821805	G	T	0.50714	0.143617	0.000413685	431365	0.0200935
rs144994980	4	55113113	G	T	0.592593	0.151398	9.07319e-05	431365	0.0199043
rs62319284	4	69493872	G	A	-0.149164	0.0421662	0.000403878	431365	0.643564
rs75547527	4	84119351	T	C	-0.437158	0.116819	0.000182419	431365	0.0286428
rs143443322	4	27256381	T	C	-0.710138	0.19154	0.000209296	431365	0.0124914
rs73259747	4	27413250	A	G	-0.450623	0.114423	8.20843e-05	431365	0.0322043
rs116401471	4	77450341	G	A	-0.781766	0.203047	0.000118035	431365	0.0103889
rs138792637	4	83032329	A	G	0.729298	0.205181	0.000378826	431365	0.00967444
rs10433879	4	88231140	C	G	-0.168726	0.0438	0.00011706	431365	0.28146
rs17772979	4	90139147	G	A	-0.255163	0.069424	0.000237454	431365	0.0894917
rs73216742	4	10687262	T	G	0.425622	0.116029	0.000244219	431365	0.0311225
rs75140135	4	26202986	T	C	-0.241803	0.067284	0.000325927	431365	0.0952429
rs1505869	4	139716412	A	G	0.202988	0.0561254	0.000298408	431365	0.853154
rs7669658	4	68250856	T	C	-0.16241	0.0394159	3.78173e-05	431365	0.547772
rs77536186	4	71688475	C	T	0.264959	0.0721288	0.000239326	431365	0.0821761
rs4298160	4	78171898	C	T	-0.425659	0.115161	0.000218847	431365	0.0300433
rs12644781	4	30668030	T	C	0.200086	0.03948	4.01957e-07	431365	0.55882
rs17603961	4	37386498	T	G	0.297827	0.0807221	0.000224662	431365	0.0629944
rs13108308	4	37907980	C	G	-0.165216	0.0425509	0.000103269	431365	0.313063
rs144121393	4	39713617	T	C	-0.489281	0.138423	0.000408244	431365	0.0215228
rs55652321	4	41232690	T	C	0.149903	0.041003	0.000256283	431365	0.364478
rs35197617	4	139236443	C	T	-0.152625	0.0393997	0.000107169	431365	0.501286
rs13152272	4	160281415	A	G	0.153914	0.0412775	0.000192411	431365	0.347923
rs6535328	4	83114857	C	T	0.176426	0.0481462	0.000247936	431365	0.789662
rs10011717	4	86136864	A	G	-0.16147	0.0417113	0.000108333	431365	0.329719
rs72676412	4	96228086	T	C	-0.420894	0.109755	0.000125652	431365	0.0380351
rs138256347	4	177571832	A	G	-0.748566	0.195505	0.000128724	431365	0.0119574
rs2580055	4	178152310	G	T	-0.21377	0.0540961	7.76068e-05	431365	0.23551
rs10025529	4	184191856	T	G	0.148873	0.0394157	0.000158723	431365	0.502461
rs115220599	4	188188101	G	T	0.439866	0.11706	0.000171534	431365	0.0284765
rs7376690	4	813726	G	A	-0.142744	0.0399009	0.00034696	431365	0.422808
rs148005307	4	17732741	G	C	-0.590553	0.16408	0.000319227	431365	0.0151729
rs74351499	4	19096154	G	C	-0.300821	0.0832443	0.000301849	431365	0.0597267
rs139336960	4	16352966	T	C	-0.619628	0.170715	0.000283844	431365	0.0139523
rs77217416	4	16567746	G	T	0.396626	0.109216	0.000281689	431365	0.0380785
rs976057	4	30193761	C	T	-0.213126	0.0556002	0.000126497	431365	0.149931
rs17811212	4	74751889	A	G	0.298675	0.0708496	2.49098e-05	431365	0.084221
rs17082470	4	54017610	T	C	-0.508578	0.137158	0.00020892	431365	0.0210255
rs77431292	4	57167101	G	A	0.29096	0.0786177	0.000214798	431365	0.066972
rs144501402	4	63467354	A	T	-0.404455	0.115403	0.000457099	431365	0.031243
rs114880905	4	76148072	G	C	-0.406695	0.112231	0.000290382	431365	0.0314762
rs185505262	4	109100383	A	C	1.09649	0.31464	0.000492312	431365	0.00415313
rs4330304	4	4369400	G	A	0.167264	0.0480318	0.000497004	431365	0.775512
rs17882862	4	5128726	G	A	-0.165827	0.0447762	0.000212667	431365	0.264171
rs73860761	4	166365788	C	T	0.991918	0.27847	0.000368002	431365	0.0056274
rs6838832	4	174655765	T	C	0.180253	0.0477067	0.00015787	431365	0.782436
rs181976144	4	151861376	A	C	-0.762167	0.208415	0.000255217	431365	0.0102926
rs13133433	4	101710132	T	C	-0.235115	0.0614298	0.000129521	431365	0.120576
rs144841614	4	105631380	T	C	-1.05621	0.291882	0.000296176	431365	0.00573433
rs7654027	4	17390764	G	A	0.163973	0.0428591	0.000130317	431365	0.698321
rs115717438	4	5817227	T	C	0.453634	0.127713	0.000382331	431365	0.026167
rs149880918	4	174736927	A	T	0.388184	0.110574	0.000447064	431365	0.033912
rs78938728	4	175971202	T	A	0.696474	0.190869	0.000263306	431365	0.0138234
rs75035565	4	182089641	A	T	-0.409467	0.113019	0.000291199	431365	0.0319639
rs6817774	4	61055763	C	T	0.235664	0.0619169	0.000141153	431365	0.886841
rs114496848	4	82960290	A	C	-0.665349	0.181029	0.000237509	431365	0.0118182
rs9996764	4	83632543	C	G	0.148	0.0411885	0.00032658	431365	0.353288
rs13153833	5	41032604	C	T	-0.175024	0.047177	0.000207305	431365	0.222647
rs10512852	5	44393569	T	C	-0.239325	0.0663352	0.000308788	431365	0.096262
rs143872073	5	45735279	G	T	-0.421649	0.118345	0.000366809	431365	0.02923
rs13153848	5	46255498	G	A	0.328347	0.0893072	0.000236363	431365	0.0543907
rs3097823	5	155332845	T	C	0.196969	0.0501157	8.48496e-05	431365	0.778295
rs183191831	5	171254818	A	G	0.8495	0.215909	8.33624e-05	431365	0.011043
rs71638298	5	84152839	T	C	-0.245456	0.0699907	0.000453221	431365	0.0855578
rs117462621	5	96301735	C	A	-1.14087	0.3103	0.000236298	431365	0.00386252
rs115813461	5	108748451	T	G	-0.737584	0.202251	0.000265454	431365	0.0103566
rs2400173	5	144572513	G	A	-0.212721	0.0608899	0.000476661	431365	0.11762
rs183793800	5	156485435	A	G	-0.60706	0.169857	0.000351649	431365	0.0143001
rs61127335	5	176060975	C	G	0.925611	0.25949	0.000361044	431365	0.00596645
rs4246822	5	178144756	A	C	-0.402244	0.103709	0.000105061	431365	0.961875
rs268484	5	9425572	A	G	0.303783	0.0769008	7.80441e-05	431365	0.928872
rs9762942	5	66523333	A	C	-0.139022	0.0397347	0.000467434	431365	0.568862
rs191570806	5	148864681	T	C	7.10248	1.94952	0.000269265	431365	0.000191467
rs13163544	5	174071838	T	C	0.152874	0.0398249	0.000123714	431365	0.584589
rs13174485	5	123126976	A	G	-0.181623	0.0445276	4.52522e-05	431365	0.269188
rs76249665	5	38575301	T	A	0.345738	0.0899127	0.000120426	431365	0.0593123
rs593979	5	55776404	C	T	-0.146359	0.040492	0.000300898	431365	0.403806
rs113683663	5	55868535	C	A	-0.540618	0.127122	2.11174e-05	431365	0.0244434
rs16892204	5	63023905	C	T	0.300819	0.0743459	5.20547e-05	431365	0.0756657
rs251313	5	65183865	A	G	0.168813	0.0400672	2.51733e-05	431365	0.483949
rs17621093	5	89952505	A	G	-0.263465	0.0739618	0.00036779	431365	0.0762276
rs116116233	5	99837519	A	G	0.750202	0.186757	5.89454e-05	431365	0.0110908
rs116196216	5	170068397	T	C	-0.603211	0.171972	0.000452137	431365	0.0131536
rs112877366	5	18536491	A	G	-0.207827	0.0533919	9.92247e-05	431365	0.164955
rs74704439	5	28039332	A	T	-0.683052	0.162257	2.55723e-05	431365	0.0147366
rs150297653	5	57535640	C	G	-0.649427	0.169045	0.000122169	431365	0.0140334
rs12697166	5	57910358	T	C	0.155367	0.0397031	9.1071e-05	431365	0.540182
rs75819577	5	63204961	C	A	-0.714486	0.177874	5.89902e-05	431365	0.0127717
rs2914029	5	65614321	C	A	0.200631	0.057087	0.000440636	431365	0.855308
rs67157132	5	55879061	T	C	-0.40309	0.114817	0.000446889	431365	0.0298254
rs115854262	5	169181722	G	C	-0.503055	0.142844	0.000428776	431365	0.0202893
rs145263346	5	141178164	C	T	0.305031	0.0865084	0.000421852	431365	0.054615
rs12520208	5	9435286	G	A	0.144416	0.0412238	0.000459663	431365	0.64574
rs75125118	5	9652525	T	C	-0.287848	0.0699409	3.86189e-05	431365	0.0855431
rs141212927	5	166739643	A	T	0.70217	0.198263	0.000397704	431365	0.0104746
rs31456	5	16931377	C	T	-0.147068	0.0399405	0.000231254	431365	0.408689
rs140120203	5	59478552	C	A	0.387091	0.105248	0.000235164	431365	0.0377673
rs10473960	5	73093021	C	G	0.433764	0.0977577	9.11654e-06	431365	0.0467474
rs1428085	5	115334043	G	A	-0.160216	0.0403074	7.04255e-05	431365	0.589828
rs10463788	5	124564573	T	C	0.172787	0.0443096	9.63785e-05	431365	0.27214
rs29998	5	55819879	A	G	-0.152727	0.0434255	0.000436486	431365	0.288518
rs4704512	5	71350204	A	G	-0.153697	0.0433619	0.000393333	431365	0.293561
rs6554595	5	1093260	T	C	0.142566	0.0397064	0.00033005	431365	0.461204
rs4702243	5	5207240	C	G	-0.140798	0.0396881	0.000388723	431365	0.495795
rs72787441	5	124384611	T	C	-0.304294	0.0863948	0.000428095	431365	0.0545206
rs146245298	5	179530357	A	G	-0.67102	0.182228	0.000231132	431365	0.0126569
rs115447686	5	104441633	C	G	-0.367452	0.102951	0.000358096	431365	0.0376758
rs112813906	5	10462678	T	C	-0.618972	0.149991	3.67951e-05	431365	0.0172302
rs575322874	5	12454083	G	T	-0.243275	0.0680485	0.000350195	431365	0.0949258
rs142947331	6	13780175	C	G	0.633765	0.15373	3.74645e-05	431365	0.0189005
rs3734451	6	85140399	A	G	-0.1976	0.0454405	1.37044e-05	431365	0.259899
rs192812100	6	94591317	A	C	0.724205	0.188052	0.000117593	431365	0.0120478
rs9486818	6	108460222	C	T	0.157497	0.0424467	0.000206876	431365	0.328993
rs12529269	6	153543830	G	A	-0.502037	0.128257	9.06692e-05	431365	0.0237305
rs6557369	6	155003916	A	G	-0.16429	0.0433966	0.000153222	431365	0.291403
rs2475208	6	3010459	T	C	-0.141413	0.0391668	0.000305577	431365	0.478567
rs78032668	6	88055736	G	A	0.543033	0.153433	0.00040131	431365	0.0168217
rs13209304	6	136573195	A	G	0.269808	0.0743968	0.000287171	431365	0.0746065
rs75530155	6	144485320	G	A	0.410451	0.115334	0.000372563	431365	0.0302311
rs151278064	6	150104903	G	A	0.510198	0.141391	0.000308078	431365	0.0208185
rs17165291	6	157787878	G	A	0.471414	0.130139	0.000291917	431365	0.0232024
rs72956707	6	119486049	G	A	-0.261503	0.0746319	0.000458501	431365	0.0759535
rs148418203	6	132203270	A	G	0.509801	0.139349	0.000253735	431365	0.022689
rs77447727	6	134161026	T	C	-0.635953	0.176263	0.000308589	431365	0.0133787
rs1621700	6	10420098	T	C	-0.176394	0.0485582	0.000280543	431365	0.221741
rs79718356	6	49800442	A	G	0.30288	0.0834593	0.00028444	431365	0.0588958
rs79765299	6	55253402	C	A	-0.644075	0.18332	0.000442415	431365	0.0117172
rs12202168	6	73541189	A	G	-0.149375	0.0422976	0.000413171	431365	0.346176
rs146075136	6	61938577	T	G	0.232211	0.0624703	0.000201484	431365	0.111011
rs180766901	6	582652	A	G	-0.396372	0.111932	0.000398336	431365	0.0346969
rs73718985	6	3193866	A	G	2.23932	0.594018	0.000163388	431365	0.0013094
rs1924666	6	9239290	A	G	-0.151953	0.0401928	0.000156441	431365	0.608177
rs140573629	6	165317708	T	C	1.02565	0.287782	0.000365292	431365	0.00525242
rs111465238	6	170352107	T	C	0.630184	0.178909	0.000427701	431365	0.0141469
rs17689265	6	70611678	T	C	-0.245981	0.0594812	3.54266e-05	431365	0.124537
rs79893813	6	118726706	C	T	-0.371348	0.104047	0.000358278	431365	0.0367337
rs56259071	6	143401083	A	G	0.240258	0.0579796	3.41547e-05	431365	0.13727
rs10872673	6	151855593	T	G	-0.154612	0.0400134	0.00011155	431365	0.596325
rs7341264	6	154520741	G	C	-0.264776	0.0643726	3.90247e-05	431365	0.105053
rs79854380	6	24507398	T	A	0.866596	0.202343	1.84557e-05	431365	0.0093844
rs806371	6	88856363	G	T	-0.219027	0.0598761	0.000254197	431365	0.123594
rs114022155	6	6937245	T	C	-0.544042	0.135998	6.32426e-05	431365	0.0214901
rs35006709	6	10453056	A	G	-0.231098	0.0644214	0.000334126	431365	0.104139
rs9486696	6	108109472	T	G	-0.298274	0.0766926	0.000100568	431365	0.0712987
rs117440830	6	145062099	G	A	0.387631	0.105504	0.000238715	431365	0.0390028
rs138411261	6	148353170	T	C	0.643112	0.179736	0.000346115	431365	0.0127331
rs190741306	6	52435874	A	C	-0.652205	0.167216	9.60395e-05	431365	0.0148838
rs72982069	6	55162219	A	G	0.511563	0.134021	0.000135064	431365	0.0245484
rs9361949	6	83323920	C	G	-0.270514	0.0654805	3.60861e-05	431365	0.101466
rs118043246	6	94429650	C	A	-0.605043	0.144264	2.74069e-05	431365	0.0187314
rs13207727	6	130454535	T	C	-0.202684	0.0557	0.000273861	431365	0.14627
rs2738822	6	170597276	T	C	0.149039	0.0406302	0.000244276	431365	0.610957
rs12665596	6	12532323	A	G	0.162282	0.0417998	0.000103448	431365	0.32853
rs111766829	6	20814721	T	G	0.496504	0.136062	0.000263172	431365	0.0237526
rs507779	6	137963592	A	C	0.176204	0.0459825	0.000127122	431365	0.239579
rs6462724	7	37008927	A	C	-0.182939	0.04831	0.000152612	431365	0.207384
rs9641273	7	101031175	G	C	-0.153427	0.0418638	0.000247429	431365	0.665232
rs4731451	7	128054100	G	A	0.143275	0.04106	0.000484117	431365	0.357448
rs77451090	7	140661961	A	G	-0.256585	0.0670931	0.000131141	431365	0.0943766
rs852444	7	5556062	G	A	0.143577	0.0400445	0.000336512	431365	0.400527
rs76982728	7	44312824	T	C	0.359917	0.0853628	2.48319e-05	431365	0.0554187
rs62454445	7	49850801	G	A	-0.292259	0.0681138	1.7807e-05	431365	0.0979376
rs4292640	7	52035335	A	G	0.244768	0.0629799	0.000101723	431365	0.109649
rs10272476	7	52110450	A	G	0.819826	0.18455	8.89979e-06	431365	0.0117415
rs75383256	7	73309777	T	C	-0.177105	0.0494399	0.000340675	431365	0.196963
rs76971099	7	89470242	T	C	0.425072	0.107109	7.23019e-05	431365	0.0374867
rs117555102	7	91100644	C	T	-0.615447	0.170554	0.000307943	431365	0.0145342
rs182039062	7	41672134	T	C	-0.509192	0.143213	0.000377285	431365	0.0199234
rs11763627	7	158070715	C	T	-0.173316	0.0469468	0.00022271	431365	0.767813
rs142242587	7	97349501	A	G	-0.582232	0.165735	0.000443037	431365	0.0144931
rs6467345	7	130766797	C	A	0.442471	0.114143	0.000105981	431365	0.964622
rs12112517	7	137743167	A	C	-0.14184	0.0403963	0.000446057	431365	0.566121
rs1528044	7	110427519	G	A	-0.260641	0.0701463	0.000202666	431365	0.91419
rs73296810	7	28915259	G	C	-0.232155	0.0650573	0.000359079	431365	0.107815
rs4723599	7	36956813	A	G	-0.450571	0.108902	3.51245e-05	431365	0.966221
rs144736828	7	8908970	G	C	-0.398642	0.109481	0.000271369	431365	0.034751
rs6976785	7	10060809	A	C	-0.216279	0.0500363	1.54316e-05	431365	0.190809
rs1717738	7	38041793	G	A	-0.19323	0.0533591	0.000293123	431365	0.837419
rs116957270	7	98691749	A	G	-0.619589	0.147583	2.69011e-05	431365	0.0187191
rs57348191	7	119833466	A	T	-0.686104	0.148414	3.78382e-06	431365	0.0211451
rs149696763	7	124474713	C	G	-0.494073	0.122893	5.81126e-05	431365	0.0272329
rs13241804	7	138723958	G	A	-0.646482	0.176419	0.000247862	431365	0.0134122
rs17172240	7	43739485	A	G	0.342729	0.0915329	0.00018088	431365	0.0489849
rs117344977	7	19288569	A	T	0.38404	0.106602	0.000315116	431365	0.0368153
rs73697311	7	63103828	G	A	-0.323364	0.0892655	0.00029177	431365	0.0916276
rs71556729	7	72989516	T	C	0.465241	0.122256	0.000141537	431365	0.0284618
rs6974204	7	78167306	C	G	0.14469	0.0396586	0.0002639	431365	0.560791
rs58169466	7	89594844	G	A	-0.239629	0.0625357	0.000127172	431365	0.112163
rs147475391	7	425678	G	T	0.215433	0.0572664	0.000168593	431365	0.333471
rs117211903	7	108553020	A	G	-0.478841	0.122822	9.6732e-05	431365	0.0256551
rs139842168	7	112513046	A	G	0.852726	0.217219	8.64988e-05	431365	0.00840992
rs192083658	7	44162934	C	G	0.774667	0.190484	4.76552e-05	431365	0.0116016
rs566983972	7	121271320	T	G	0.788781	0.205685	0.000125623	431365	0.0130948
rs6979285	7	132913887	A	G	0.305626	0.086304	0.000398199	431365	0.0547103
rs272673	7	24107213	A	G	-0.278457	0.075103	0.000209175	431365	0.074975
rs188313883	7	61771271	A	T	0.222256	0.06369	0.000483649	431365	0.135366
rs141745930	7	67825023	T	C	0.63729	0.145892	1.25262e-05	431365	0.020281
rs76401414	7	69169840	T	C	0.5383	0.133097	5.24542e-05	431365	0.0219735
rs6969489	7	72978233	T	G	-0.283855	0.0771519	0.000233991	431365	0.0735274
rs535289425	7	90769153	T	C	0.418572	0.11926	0.000448528	431365	0.047167
rs4128913	8	132291603	C	A	0.172885	0.0480553	0.000321122	431365	0.210213
rs4876083	8	1470535	T	G	0.368519	0.0919991	6.18401e-05	431365	0.0479444
rs117588573	8	35361112	C	G	-0.574442	0.160154	0.000334742	431365	0.0157006
rs2054103	8	38408406	A	G	0.574817	0.15634	0.00023626	431365	0.0164109
rs56131485	8	41805173	C	A	0.27231	0.0684401	6.92612e-05	431365	0.0956333
rs28414882	8	9694905	T	G	0.263918	0.0579177	5.19422e-06	431365	0.133915
rs79601065	8	14748237	A	G	-0.691411	0.191251	0.000300123	431365	0.0107042
rs72666544	8	66655253	T	C	0.44982	0.122907	0.000252371	431365	0.0260148
rs117295150	8	72774277	G	C	-0.700024	0.182352	0.000123603	431365	0.0119056
rs79678070	8	34838361	A	G	0.381061	0.106265	0.00033583	431365	0.0354234
rs145489425	8	36683210	G	A	0.577317	0.155677	0.000208545	431365	0.0170391
rs35640321	8	110881153	A	G	0.43974	0.123881	0.000385683	431365	0.0286096
rs55864378	8	119778885	T	C	0.215837	0.0598715	0.000312155	431365	0.124454
rs13277896	8	3924221	C	G	-0.189459	0.0517378	0.000250351	431365	0.177303
rs191836589	8	6329580	T	C	-0.655092	0.177224	0.00021867	431365	0.0125171
rs12678765	8	6928074	T	C	0.925471	0.256891	0.000315072	431365	0.00680154
rs73205478	8	15005521	C	G	-0.427627	0.117763	0.000282053	431365	0.0280005
rs117604761	8	15013728	T	G	0.491356	0.135901	0.00029973	431365	0.0215538
rs35388015	8	40244929	A	T	0.244017	0.0643922	0.000150928	431365	0.105215
rs116944713	8	15363304	A	G	0.58901	0.149337	8.00793e-05	431365	0.019102
rs79567661	8	142382207	A	C	0.366117	0.0943011	0.000103421	431365	0.0455105
rs78030257	8	143101384	T	C	-0.311246	0.0804208	0.000108738	431365	0.0639793
rs118155942	8	69781646	A	G	-0.352226	0.0944017	0.000190612	431365	0.046654
rs13254763	8	69102803	C	T	0.166394	0.0477128	0.000487719	431365	0.217933
rs143959783	8	74295470	A	G	0.531559	0.145893	0.000268974	431365	0.0188017
rs116272300	8	59043489	A	G	-0.445943	0.11634	0.000126546	431365	0.0291995
rs2594811	8	55213574	C	A	2.62415	0.75206	0.000484306	431365	0.000793817
rs73592140	8	18233903	G	A	0.331318	0.0928792	0.000360828	431365	0.0494127
rs4841552	8	11404093	T	G	0.141315	0.0402386	0.000444857	431365	0.499068
rs57043031	8	56404688	C	T	0.817053	0.226387	0.000307263	431365	0.00804862
rs10955718	8	89659365	C	G	0.171732	0.0489977	0.000456783	431365	0.203019
rs2680745	8	139376316	C	T	0.155248	0.0416157	0.000191095	431365	0.661472
rs4738235	8	73242240	G	A	0.211348	0.046623	5.81152e-06	431365	0.699391
rs10504641	8	77692689	C	T	-0.305818	0.0843601	0.000288795	431365	0.0583604
rs77574512	8	87198662	A	C	0.289681	0.0810188	0.000349591	431365	0.0685078
rs188095186	8	114723908	T	C	0.277338	0.0774896	0.000344874	431365	0.070052
rs149583601	8	115651885	C	T	-0.747067	0.208664	0.000343289	431365	0.0105222
rs3739216	8	26627249	C	G	-0.300395	0.0832425	0.000307773	431365	0.0588047
rs34923984	8	30164860	A	T	-0.17997	0.0488438	0.00022906	431365	0.207163
rs7839165	8	97356685	G	A	-0.182422	0.0475496	0.000124816	431365	0.222406
rs74547831	9	1830398	T	A	-0.595536	0.158644	0.000174105	431365	0.0157372
rs1547138	9	83472357	T	G	-0.188178	0.0534928	0.000435111	431365	0.161418
rs77255353	9	84046114	T	A	0.715535	0.184226	0.000102745	431365	0.0114924
rs112366131	9	27261291	G	A	-0.334733	0.0954089	0.000450796	431365	0.0465149
rs10971130	9	32792089	G	A	0.245863	0.0660521	0.000197447	431365	0.099438
rs28491938	9	41980474	T	C	-0.296829	0.0831346	0.000356361	431365	0.208408
rs1332170	9	25500044	T	C	-0.653166	0.181054	0.000309079	431365	0.987003
rs73422659	9	17699317	A	G	0.267135	0.0732083	0.000263287	431365	0.0780053
rs75417769	9	10880208	C	T	0.4354	0.113028	0.000117093	431365	0.041966
rs72693867	9	4385034	A	T	1.01112	0.284437	0.000378277	431365	0.00488513
rs642485	9	12869191	C	G	0.156026	0.0447766	0.000492992	431365	0.731709
rs10756529	9	14055792	C	T	-0.148767	0.0424731	0.000460723	431365	0.316973
rs1323350	9	14405297	C	T	0.187884	0.0505912	0.000204202	431365	0.188157
rs116979494	9	21906587	A	G	0.521907	0.148637	0.000445964	431365	0.0212929
rs117104845	9	4219807	A	G	-0.67329	0.189674	0.000385629	431365	0.0114565
rs10758624	9	4502575	A	G	0.255378	0.0685335	0.00019429	431365	0.0899721
rs1599045	9	89641577	C	T	-0.184628	0.0529955	0.000494277	431365	0.836151
rs10858376	9	138158757	C	G	0.15795	0.0419112	0.000164116	431365	0.403471
rs580316	9	113576584	T	G	-0.161773	0.0441273	0.00024632	431365	0.272564
rs77632952	9	105276008	A	G	-0.264146	0.0711114	0.000203573	431365	0.0828709
rs186884964	9	28285425	G	A	-1.07381	0.264519	4.91836e-05	431365	0.00635335
rs117035346	9	71280915	T	G	-0.507513	0.141377	0.000330948	431365	0.0226851
rs117365181	9	73759582	T	A	-0.494928	0.131334	0.000164252	431365	0.0237225
rs321729	9	28761770	G	A	-0.372852	0.1014	0.000235961	431365	0.959508
rs112091296	9	28988746	T	C	0.481872	0.127689	0.000160776	431365	0.0259453
rs117364041	9	10940154	A	G	-0.341939	0.0961169	0.00037436	431365	0.0456141
rs72700749	9	12458753	T	A	-0.353602	0.069956	4.31211e-07	431365	0.0857442
rs12686478	9	82817342	A	G	-0.2488	0.0660579	0.000165619	431365	0.098773
rs2778887	9	121937495	G	C	-0.589695	0.168782	0.000476157	431365	0.0137793
rs78586521	9	75711756	T	C	0.62709	0.164537	0.000138277	431365	0.0145741
rs62560460	9	20813155	T	C	0.344864	0.0961187	0.000333365	431365	0.0441581
rs9407663	9	15846459	T	C	0.264326	0.0673357	8.65506e-05	431365	0.0949608
rs74370188	9	124966842	A	G	0.495385	0.13761	0.000318324	431365	0.0214305
rs138004824	9	130986144	A	G	-0.333555	0.0858236	0.00010169	431365	0.0643709
rs140894194	9	99527864	A	G	0.712423	0.203716	0.000470295	431365	0.0103582
rs10429522	9	101167839	G	A	-0.245897	0.0648504	0.000149586	431365	0.10397
rs10979420	9	111396522	A	G	-0.331084	0.0902257	0.000243019	431365	0.0543648
rs10811171	9	1941056	T	C	0.397768	0.106471	0.000187029	431365	0.0361423
rs2254719	9	130282097	A	G	0.138976	0.0396578	0.000457646	431365	0.481456
rs141988429	9	31904876	G	A	-0.3857	0.109	0.000402356	431365	0.0351622
rs28685884	9	41980635	T	C	-0.254174	0.0668699	0.000144102	431365	0.468921
rs62569906	9	72416222	C	T	0.425096	0.116791	0.000272854	431365	0.0305505
rs12551119	9	76731402	G	A	-0.153711	0.0429691	0.000347248	431365	0.29889
rs7040839	9	116661676	C	G	0.159284	0.0453675	0.000446468	431365	0.251685
rs7029693	9	119308184	T	G	0.14391	0.04096	0.000442364	431365	0.362127
rs9804343	10	47617399	G	A	-0.270568	0.0762697	0.000388875	431365	0.0745546
rs12570576	10	1770039	G	C	-0.315873	0.0818689	0.000114188	431365	0.0625058
rs7099846	10	38565080	G	A	0.168568	0.0482735	0.000479513	431365	0.439808
rs79069783	10	106687304	G	T	0.374332	0.0975626	0.000124626	431365	0.0425146
rs4575188	10	113982162	G	A	0.195703	0.0470484	3.18787e-05	431365	0.225615
rs117283768	10	127730099	G	A	0.448729	0.119882	0.000181761	431365	0.0297274
rs150776109	10	39064113	A	G	0.82291	0.232886	0.000410053	431365	0.01013
rs117250536	10	88726541	T	G	-0.45603	0.13074	0.000486508	431365	0.0232781
rs4933189	10	92305916	C	T	0.185891	0.0507707	0.000250848	431365	0.816626
rs80004378	10	106187247	C	T	-0.610951	0.172149	0.00038675	431365	0.0137816
rs117847662	10	121649924	C	A	0.320829	0.0876587	0.000252244	431365	0.0544728
rs139581043	10	133819362	A	G	-0.39137	0.103729	0.00016128	431365	0.040436
rs2782389	10	29008583	C	T	0.148865	0.0395158	0.000165078	431365	0.525035
rs149999815	10	30892944	C	T	0.426688	0.121744	0.000456972	431365	0.030038
rs12780201	10	2480445	G	A	-0.197266	0.0553801	0.000367976	431365	0.146698
rs34918172	10	109111167	G	A	-0.139534	0.039667	0.000435422	431365	0.469431
rs34232808	10	6685826	A	G	-0.45281	0.125139	0.000296353	431365	0.0252281
rs2244677	10	30678440	A	G	-0.142028	0.039244	0.000295617	431365	0.525408
rs143385052	10	38284541	C	G	-0.283361	0.0796819	0.000376322	431365	0.0659831
rs140221251	10	53295761	T	G	-0.519929	0.141674	0.00024265	431365	0.0204954
rs146021353	10	53306866	G	T	0.817495	0.208294	8.6834e-05	431365	0.0105322
rs78603611	10	60505783	A	G	0.842458	0.227977	0.000219568	431365	0.00831797
rs2459093	10	123818827	C	A	-0.168912	0.0414642	4.62786e-05	431365	0.657752
rs7894000	10	131932696	T	A	-0.254873	0.0673578	0.000154412	431365	0.897783
rs72798646	10	54673934	C	T	-0.391713	0.107828	0.000280414	431365	0.0343672
rs7076688	10	64429202	C	T	-0.466108	0.131485	0.000392699	431365	0.022899
rs11595365	10	109071871	A	C	0.501178	0.135634	0.000219811	431365	0.0214488
rs1103142	10	76493179	A	G	0.27624	0.0704794	8.87544e-05	431365	0.0899836
rs586594	10	30588673	T	G	-0.197279	0.0553733	0.000367054	431365	0.854031
rs147358247	10	33323016	T	C	-0.467998	0.130711	0.000343068	431365	0.0263139
rs4880496	10	1352211	C	G	-0.137751	0.0395188	0.000490863	431365	0.484809
rs41292614	10	114135179	G	A	0.359591	0.0925932	0.000102939	431365	0.048189
rs75772885	10	130421561	A	G	-0.227642	0.0577732	8.13879e-05	431365	0.140026
rs61849881	10	53804746	T	C	0.452454	0.124885	0.000291246	431365	0.0267284
rs543727891	10	135294244	C	G	0.498393	0.131047	0.000142853	431365	0.0287744
rs274313	10	25242947	T	C	-0.146036	0.040493	0.000310413	431365	0.387788
rs150658858	10	28574249	T	G	0.52861	0.149494	0.000406247	431365	0.0182781
rs73606787	10	5627689	A	G	0.291705	0.0837561	0.000496215	431365	0.0579124
rs3905634	10	11389400	G	A	-0.169826	0.0479428	0.000396698	431365	0.771996
rs11194320	10	110729036	G	T	6.28996	1.72547	0.000267024	431365	0.000159359
rs4752531	10	123083939	T	C	-0.172339	0.0439264	8.73253e-05	431365	0.276655
rs369707488	10	125376234	G	A	0.550722	0.153773	0.000341751	431365	0.0165607
rs7917433	10	129568614	C	T	0.214484	0.053743	6.58188e-05	431365	0.83931
rs1010719	10	98257739	T	C	-0.153185	0.0421094	0.000274998	431365	0.318011
rs12249142	10	88379312	G	T	-0.406203	0.115383	0.000430784	431365	0.030448
rs75262790	10	88482279	G	A	-0.23399	0.0518085	6.28912e-06	431365	0.172174
rs17670852	11	123206593	A	G	-0.261319	0.0705003	0.000210029	431365	0.0844237
rs144424487	11	127240211	G	T	0.646565	0.174648	0.000213821	431365	0.0134259
rs16937914	11	44362601	A	G	-0.660747	0.188998	0.000472204	431365	0.0109281
rs2908206	11	61286692	A	G	-0.352584	0.0960205	0.000240691	431365	0.0461574
rs11023745	11	15878173	C	G	0.151376	0.0411419	0.000233819	431365	0.647989
rs2169355	11	122995279	G	A	-0.158329	0.0433319	0.000258321	431365	0.694058
rs117716501	11	123899488	A	C	-0.492006	0.134444	0.000252656	431365	0.0225951
rs148742128	11	125777302	C	G	0.328496	0.0884584	0.000204362	431365	0.0557683
rs11605349	11	126305755	C	T	-0.248296	0.0631527	8.43548e-05	431365	0.108387
rs11036422	11	41514285	T	C	-0.150707	0.0399542	0.000161942	431365	0.409357
rs12808044	11	43949098	A	G	-0.198392	0.0504078	8.29392e-05	431365	0.189113
rs11602126	11	116523330	G	A	-0.322814	0.088418	0.000261222	431365	0.0607367
rs144576745	11	124954849	C	G	-0.434508	0.107363	5.18609e-05	431365	0.0361089
rs547865707	11	102505375	G	A	1.15864	0.265337	1.26151e-05	431365	0.00551264
rs2028570	11	20104669	A	G	0.139051	0.0398758	0.00048827	431365	0.574047
rs523639	11	30561123	A	C	1.37069	0.388338	0.000416141	431365	0.00425097
rs140353190	11	4384409	C	T	0.684606	0.176718	0.000107061	431365	0.012791
rs12287398	11	7107182	G	A	-0.436024	0.121271	0.00032381	431365	0.0267075
rs10741594	11	12563953	A	G	-0.209999	0.057565	0.000264247	431365	0.839406
rs116931529	11	80618835	T	C	-0.485705	0.136219	0.000362994	431365	0.0227879
rs72941768	11	78584836	G	A	0.703965	0.200421	0.000444028	431365	0.010357
rs147476131	11	56817878	A	G	-0.672223	0.184862	0.000276529	431365	0.0118823
rs11222672	11	131367526	T	C	0.190464	0.0538201	0.000401809	431365	0.169712
rs35750459	11	66778520	A	G	-0.656089	0.179515	0.000257401	431365	0.0122811
rs34326612	11	40235087	T	C	0.277836	0.0730358	0.000142318	431365	0.0815283
rs73015325	11	128602693	A	T	-0.634046	0.175452	0.000301745	431365	0.0146708
rs4561213	11	24678819	G	T	0.148375	0.0393756	0.000164426	431365	0.532372
rs11031550	11	32040936	G	T	-0.292414	0.0704409	3.30742e-05	431365	0.0867538
rs78608627	11	2580107	C	A	0.773466	0.171052	6.13126e-06	431365	0.0153176
rs116870407	11	7447716	G	A	-0.688588	0.170998	5.6521e-05	431365	0.0133176
rs2278606	11	45167534	A	C	0.148494	0.0401202	0.00021457	431365	0.586534
rs71488430	11	59748926	T	C	-0.476783	0.131976	0.000303103	431365	0.0236315
rs371637928	12	17957608	T	C	-0.751827	0.184241	4.49076e-05	431365	0.0127389
rs60984061	12	73521761	T	C	0.445148	0.122109	0.000266889	431365	0.0266289
rs7962456	12	83413561	C	T	0.15658	0.0413874	0.000154771	431365	0.658834
rs61920358	12	26778281	T	C	0.188013	0.0510348	0.000229588	431365	0.18217
rs11610061	12	100050148	T	C	-0.150811	0.0432921	0.000494755	431365	0.295155
rs7958163	12	114275242	A	C	0.157498	0.0439512	0.000339039	431365	0.275082
rs6581395	12	61826845	G	A	-0.154614	0.0418199	0.000218042	431365	0.329803
rs80320255	12	62032635	G	C	-0.952778	0.267167	0.00036216	431365	0.00563127
rs138072544	12	442832	T	C	0.728883	0.206041	0.000403841	431365	0.0101735
rs4763772	12	12221052	G	T	-0.154948	0.0398608	0.000101396	431365	0.437993
rs75000373	12	125084220	A	G	0.22211	0.0581148	0.000132413	431365	0.13582
rs139359869	12	1498852	G	A	0.834599	0.236293	0.000412344	431365	0.00756254
rs11048394	12	26208017	A	G	-0.249753	0.0642524	0.000101464	431365	0.104511
rs4764451	12	19191216	A	G	0.300101	0.0822072	0.00026168	431365	0.9388
rs303820	12	52212428	C	G	0.150919	0.0397605	0.000147231	431365	0.420153
rs111903793	12	98855618	T	C	-0.590882	0.155867	0.000150079	431365	0.0179553
rs117561961	12	117561364	T	C	0.531355	0.149794	0.000389287	431365	0.0174162
rs714325	12	118366809	A	G	0.195776	0.0558138	0.000452064	431365	0.143869
rs148064207	12	115324830	A	G	0.663143	0.186186	0.000368426	431365	0.0136973
rs1258563	12	130738372	G	C	0.482279	0.13616	0.000397109	431365	0.978431
rs7136511	12	25045767	G	A	-0.228638	0.0650308	0.000438359	431365	0.101545
rs116984772	12	13200105	A	G	-0.347832	0.0981352	0.000393478	431365	0.0418062
rs138489940	12	78393168	G	C	0.755284	0.194322	0.00010159	431365	0.0106091
rs4315127	12	85104050	C	G	0.229667	0.0549319	2.90295e-05	431365	0.150554
rs3214023	12	53682986	T	C	0.143764	0.0401174	0.000338922	431365	0.605321
rs740764	12	5165575	A	G	0.142689	0.0398704	0.000345168	431365	0.407764
rs77515653	12	53518073	C	T	0.654169	0.184707	0.000397612	431365	0.0113783
rs118108566	12	103489415	C	G	-0.590981	0.168537	0.000453983	431365	0.0149802
rs1535903	13	43371390	T	C	-0.174151	0.0490174	0.000381083	431365	0.200418
rs4942365	13	45394796	G	C	-0.30024	0.0744251	5.48075e-05	431365	0.077412
rs9570723	13	63333722	C	G	0.190729	0.0546253	0.000480153	431365	0.154453
rs7334152	13	75027062	T	G	0.244085	0.0663322	0.000233469	431365	0.0973498
rs117004350	13	76726560	T	C	-0.326638	0.0864644	0.000158274	431365	0.0541352
rs11619115	13	77248491	A	C	-0.262308	0.0714948	0.000243585	431365	0.0829789
rs17181753	13	79602165	A	G	-0.199767	0.0495729	5.58316e-05	431365	0.195369
rs112232866	13	95966432	A	G	0.145529	0.0401138	0.00028572	431365	0.412291
rs1329305	13	35187451	C	G	-0.142945	0.0405046	0.000416965	431365	0.390612
rs118154216	13	49410399	T	C	-0.618294	0.169068	0.000255106	431365	0.0143248
rs78732993	13	55411749	G	A	-0.76706	0.19734	0.000101489	431365	0.00958228
rs4773684	13	93109698	G	A	-0.160857	0.0401725	6.22372e-05	431365	0.402999
rs74124096	13	110953710	A	T	-0.301831	0.0814985	0.000212633	431365	0.0622154
rs4773198	13	111155711	T	C	-0.147092	0.0406943	0.000300864	431365	0.367859
rs183314480	13	42989461	T	C	0.889587	0.252934	0.000436345	431365	0.0066146
rs112466146	13	76361257	A	G	-0.673926	0.186984	0.000313134	431365	0.0111361
rs34567825	13	67027435	C	T	-0.172252	0.0482078	0.000352777	431365	0.216117
rs12018239	13	79503567	T	C	0.161029	0.0435295	0.000216182	431365	0.313564
rs66562849	13	95616955	G	T	0.287123	0.0752855	0.000136852	431365	0.0733746
rs4421862	13	108940408	A	G	0.171183	0.0462014	0.000211261	431365	0.238683
rs117177047	13	32005948	T	C	-0.484348	0.12601	0.000121188	431365	0.0250452
rs74048385	13	34717054	A	C	-0.214053	0.057738	0.000209474	431365	0.137882
rs2875315	13	63928549	T	C	0.470499	0.134424	0.000465072	431365	0.021762
rs1164504	13	76867112	C	T	-0.185618	0.0501006	0.000211471	431365	0.189635
rs4363758	13	77386392	T	C	-0.18664	0.0464355	5.8362e-05	431365	0.237239
rs9577246	13	114022946	A	G	-0.514875	0.146056	0.000423175	431365	0.0185271
rs57541225	13	92795382	C	T	-0.223906	0.0601728	0.000198395	431365	0.128153
rs4773905	13	96083646	T	C	-0.165405	0.0424328	9.69706e-05	431365	0.312809
rs2054698	14	42733044	T	C	0.41607	0.108838	0.000131929	431365	0.0357521
rs144655993	14	62343520	C	G	0.746553	0.17974	3.27401e-05	431365	0.0119469
rs11848070	14	71507601	A	G	-0.179951	0.0445587	5.37898e-05	431365	0.739433
rs10132940	14	83443797	A	T	0.309993	0.0634891	1.04686e-06	431365	0.108061
rs28667752	14	24039742	A	G	0.648504	0.170388	0.000141211	431365	0.0134631
rs77147810	14	40496705	G	A	0.367287	0.104362	0.000432584	431365	0.0388284
rs148332433	14	26036940	G	T	-0.523444	0.13692	0.000131847	431365	0.0238185
rs117891081	14	83057383	T	C	-0.64784	0.171717	0.000161473	431365	0.0135512
rs2069978	14	95054802	T	C	-0.299457	0.0817638	0.000249799	431365	0.0613835
rs999684	14	95928090	T	A	0.163023	0.046606	0.000468932	431365	0.72192
rs199967798	14	106193196	G	A	-0.290647	0.071301	4.57509e-05	431365	0.206817
rs111335485	14	57641761	A	T	-0.702061	0.183888	0.000134611	431365	0.012462
rs72699314	14	82880069	G	A	0.230881	0.0611348	0.00015899	431365	0.118693
rs9658649	14	93393102	C	T	0.652171	0.182732	0.000358352	431365	0.0120429
rs2077841	14	34311717	G	A	-0.211667	0.0522781	5.14671e-05	431365	0.177617
rs117624342	14	45051530	A	C	0.427617	0.113678	0.000168787	431365	0.032172
rs78255431	14	49009291	C	T	-0.336697	0.0966893	0.00049721	431365	0.0451769
rs78952372	14	100763573	G	C	0.658715	0.159072	3.45804e-05	431365	0.016887
rs7141602	14	101765860	T	C	0.156134	0.0412178	0.000151852	431365	0.646739
rs4537934	14	49006020	G	C	0.149245	0.040642	0.000240475	431365	0.507586
rs141689688	14	98522127	A	G	-0.464085	0.12915	0.00032643	431365	0.0242527
rs145575848	14	21717702	A	G	-0.388571	0.100499	0.000110443	431365	0.0466029
rs72666816	14	26645910	C	T	0.890539	0.207569	1.78414e-05	431365	0.00981334
rs148518726	14	81281396	T	C	1.07836	0.304367	0.000395676	431365	0.00471759
rs7148204	14	95146741	C	A	-0.159422	0.0428934	0.000201851	431365	0.697299
rs17594910	15	45413541	C	T	-0.265746	0.0732807	0.000287389	431365	0.0766191
rs78674770	15	24232280	C	G	0.392912	0.105084	0.000184731	431365	0.0422671
rs143730859	15	24719940	A	T	0.313935	0.0871321	0.000314594	431365	0.0594157
rs72693690	15	25148796	T	G	-0.298094	0.0831608	0.00033766	431365	0.0594834
rs77406326	15	27681929	C	A	-0.605081	0.168107	0.000318985	431365	0.0159055
rs28872021	15	31581607	G	T	0.384678	0.109673	0.000452345	431365	0.0417218
rs117292140	15	33774522	C	A	-0.817605	0.210145	9.99701e-05	431365	0.00917491
rs12438667	15	92261184	C	T	-1.09627	0.270774	5.15134e-05	431365	0.00543007
rs147723860	15	99383362	T	C	0.571734	0.163782	0.000481526	431365	0.0166633
rs72700062	15	26787942	T	G	0.442921	0.118341	0.000182016	431365	0.0287322
rs1093542	15	29619594	C	T	0.15725	0.0436129	0.000311466	431365	0.661683
rs16964853	15	33385074	G	A	0.268959	0.0754731	0.000365746	431365	0.0734881
rs55953731	15	45223192	G	C	0.472704	0.124262	0.000142321	431365	0.0271421
rs2960793	15	60248258	T	C	0.158798	0.0451217	0.000432653	431365	0.253275
rs75826896	15	67554090	A	C	0.502171	0.132342	0.000147941	431365	0.023114
rs653543	15	40375847	C	G	-0.580845	0.143945	5.45595e-05	431365	0.980256
rs72729455	15	40229240	G	A	0.718952	0.169775	2.28818e-05	431365	0.0152201
rs72743885	15	81895435	C	A	0.373745	0.0965231	0.000107912	431365	0.0466203
rs151103325	15	98728860	T	C	0.946522	0.235413	5.8027e-05	431365	0.00788843
rs117719296	15	36724702	G	A	0.462767	0.119043	0.000101323	431365	0.0276323
rs1524848	15	24023785	A	C	-0.208608	0.0565575	0.000225647	431365	0.15087
rs7170927	15	36676401	A	G	-0.23052	0.0653765	0.000421813	431365	0.101151
rs8025949	15	91576037	G	A	0.397937	0.111568	0.00036141	431365	0.0328918
rs117221447	15	97807441	T	C	-0.560591	0.132106	2.20065e-05	431365	0.0227334
rs72792726	16	74722951	T	G	-0.228597	0.0617624	0.000214551	431365	0.118211
rs55636015	16	78637464	C	A	-0.352878	0.0911527	0.000108265	431365	0.0535371
rs12920236	16	81412168	A	G	-0.144453	0.0394168	0.000247577	431365	0.529292
rs543627617	16	86033260	T	C	0.833564	0.20486	4.7227e-05	431365	0.0117634
rs117376372	16	87729397	T	C	-0.413962	0.116049	0.000360911	431365	0.0301919
rs237677	16	1040849	C	T	0.156769	0.0403707	0.000103079	431365	0.56422
rs11248851	16	1102701	T	C	-0.143474	0.0394998	0.000280931	431365	0.455912
rs11647368	16	8513688	C	A	0.297971	0.0843424	0.000411074	431365	0.059572
rs140489026	16	49469079	T	C	-0.656283	0.186992	0.000448642	431365	0.0115258
rs874504	16	57853343	T	C	0.156802	0.0403857	0.000103345	431365	0.380581
rs8056057	16	78866657	C	G	-0.147633	0.0414659	0.000370374	431365	0.351766
rs929299	16	74059742	C	T	0.145267	0.0396367	0.000247383	431365	0.429213
rs3815802	16	58296545	A	G	-0.149679	0.042869	0.000480242	431365	0.701829
rs55893489	16	9705583	G	A	0.191482	0.0549429	0.000491949	431365	0.154535
rs150928428	16	16000072	A	T	0.636969	0.178632	0.000362727	431365	0.0171814
rs56201455	16	20141311	T	C	0.340588	0.0975813	0.000482481	431365	0.0431606
rs6497964	16	26855213	C	G	-0.359675	0.0815202	1.02374e-05	431365	0.0634475
rs142442103	16	31509847	C	A	-0.872911	0.230547	0.000152933	431365	0.00773747
rs149362097	16	84279688	T	A	0.862092	0.214565	5.87286e-05	431365	0.00883502
rs35506727	16	79206921	G	A	-0.286606	0.0820772	0.000479579	431365	0.0633093
rs7190498	16	80395261	G	A	-0.200005	0.0550768	0.000281916	431365	0.151805
rs2967315	16	82309273	G	C	0.173452	0.0446107	0.000101025	431365	0.679185
rs1169647	16	86537913	C	A	0.176498	0.0506651	0.000494675	431365	0.186152
rs560600928	16	89275413	A	G	-0.855899	0.212441	5.60428e-05	431365	0.00953643
rs11865981	16	4970208	A	C	-0.197223	0.051235	0.000118421	431365	0.817737
rs140219446	16	21995737	T	C	-0.655437	0.181584	0.000306726	431365	0.01182
rs11076487	16	49648130	G	A	0.17544	0.0466151	0.000167494	431365	0.75901
rs10153117	16	77683337	T	G	0.449208	0.115643	0.00010257	431365	0.0322557
rs141413508	16	89760840	C	G	-0.538753	0.140396	0.000124345	431365	0.0205842
rs149187078	16	3139036	A	C	0.635511	0.164416	0.000110966	431365	0.0170657
rs2531999	16	4170523	T	G	0.243204	0.0697153	0.000485669	431365	0.913198
rs8049549	16	7461523	C	A	-0.139871	0.0400342	0.000476234	431365	0.430461
rs1074725	16	10694576	G	T	-0.164877	0.0446992	0.000225502	431365	0.727641
rs566732284	16	16674306	C	G	0.485466	0.138263	0.000446139	431365	0.0365216
rs138700020	16	56055681	T	C	0.402855	0.113775	0.000398915	431365	0.0319928
rs79217285	16	72028079	T	C	-0.430827	0.122291	0.000426737	431365	0.0268015
rs7219981	17	55795747	G	A	0.185988	0.0505555	0.00023425	431365	0.814609
rs56168354	17	72477183	T	C	-0.503505	0.138093	0.000266226	431365	0.0208452
rs2474696	17	706339	T	C	-0.186292	0.047495	8.7692e-05	431365	0.755495
rs144431013	17	9676115	G	C	-0.621676	0.160499	0.000107332	431365	0.0152152
rs76819666	17	29932389	G	A	-0.348959	0.0923206	0.000156921	431365	0.0473302
rs184185677	17	38313907	A	G	-0.322858	0.089152	0.000292981	431365	0.052482
rs76606832	17	50290847	G	T	-1.19247	0.309609	0.000117382	431365	0.0042028
rs111302437	17	52812109	C	T	0.46758	0.131702	0.000384822	431365	0.0243598
rs12950793	17	6051358	T	C	0.198667	0.0561244	0.000400488	431365	0.143372
rs138266505	17	11057958	T	C	0.61633	0.166349	0.000211354	431365	0.0158722
rs17690883	17	43928866	T	C	-0.241828	0.0569212	2.15229e-05	431365	0.138286
rs7221332	17	8517826	G	A	-0.169558	0.0457491	0.000210344	431365	0.2455
rs2236749	17	71162443	T	C	0.168402	0.0457433	0.000231894	431365	0.756227
rs76806950	17	75562077	T	C	-0.278301	0.0721338	0.000114262	431365	0.0835453
rs4548913	17	2209888	A	G	-0.146069	0.0410217	0.000369752	431365	0.637701
rs185796102	17	4303722	A	G	0.800513	0.223532	0.000342019	431365	0.00918591
rs17730990	17	37117536	G	A	-0.464237	0.12294	0.000159276	431365	0.0258753
rs74495366	17	49624140	G	C	-0.464873	0.125438	0.000210557	431365	0.0281226
rs149394708	17	52011552	C	A	0.951151	0.268366	0.000393759	431365	0.00557742
rs143646387	17	5826635	A	G	-0.555506	0.158314	0.000449997	431365	0.017329
rs7222302	17	20528942	G	A	0.150347	0.0404329	0.000200452	431365	0.401935
rs11869535	17	62161933	G	A	0.258277	0.0704147	0.000244506	431365	0.0855517
rs12453472	17	64536796	T	G	0.361562	0.0931207	0.000103293	431365	0.0470292
rs117734355	17	74969577	T	C	-0.454761	0.10122	7.02927e-06	431365	0.044663
rs113250589	17	76960078	A	G	-0.531771	0.147318	0.000306584	431365	0.0188634
rs7226446	18	6101635	A	T	-0.211325	0.0534484	7.69184e-05	431365	0.16377
rs8092265	18	11953085	C	T	0.211312	0.0530218	6.73736e-05	431365	0.166332
rs76879885	18	23064597	G	A	0.311153	0.0807728	0.00011706	431365	0.0640349
rs55934014	18	36203647	C	T	-0.294653	0.0825316	0.000356722	431365	0.0614577
rs9965360	18	67286267	C	A	-0.155818	0.0409494	0.00014172	431365	0.633201
rs72874324	18	13897371	A	G	0.543589	0.148638	0.000255053	431365	0.0178481
rs17382842	18	5521132	G	A	0.603598	0.163258	0.000217987	431365	0.014612
rs181096352	18	31112359	A	C	0.647778	0.182674	0.000390994	431365	0.012902
rs117538693	18	39907324	A	G	0.588412	0.150113	8.86278e-05	431365	0.0186444
rs117890285	18	55845829	G	A	-0.489484	0.138194	0.0003971	431365	0.0240661
rs143547166	18	55340503	C	T	0.984505	0.230552	1.9529e-05	431365	0.00864949
rs7231513	18	71646740	T	A	-0.205671	0.0556976	0.000221937	431365	0.85317
rs516410	18	72407862	A	G	0.161076	0.044391	0.00028499	431365	0.730075
rs4800213	18	22904116	G	A	0.43438	0.0978268	8.98359e-06	431365	0.957306
rs62087101	18	27234008	A	G	-0.511667	0.134949	0.000149706	431365	0.0247778
rs1390431	18	34119428	T	C	-0.15446	0.039322	8.56269e-05	431365	0.514665
rs475452	18	43552841	G	A	0.201644	0.0557297	0.000296613	431365	0.144199
rs147276482	18	70550585	C	G	-0.651714	0.1831	0.000371809	431365	0.0140039
rs4940872	18	57086967	G	T	-0.146544	0.0394786	0.000205632	431365	0.437414
rs529218264	18	74106147	A	G	0.152231	0.0410524	0.000208737	431365	0.563098
rs7505447	18	23331674	A	G	0.320244	0.0888841	0.000314637	431365	0.0760129
rs117168124	18	26785429	T	C	-0.618234	0.177157	0.000483471	431365	0.0141627
rs28703870	18	27019325	G	A	0.48989	0.125584	9.58341e-05	431365	0.024888
rs146613948	18	30223926	A	G	-0.782993	0.224202	0.000478773	431365	0.00861009
rs34501108	18	52828557	A	G	-0.276881	0.0777149	0.000366944	431365	0.0765394
rs62091381	18	22123171	A	G	-0.191691	0.0535523	0.000344239	431365	0.159452
rs186506376	18	32500041	G	C	-0.906131	0.207857	1.30419e-05	431365	0.00973774
rs147056722	18	36048896	A	G	-9.00858	2.27248	7.36394e-05	431365	0.000374111
rs74462261	18	37956345	A	T	-0.574111	0.140896	4.60713e-05	431365	0.0200507
rs4891761	18	67297844	A	T	-0.260946	0.0552628	2.33631e-06	431365	0.850748
rs243418	18	73830395	G	A	0.348469	0.0977714	0.000365082	431365	0.957049
rs67150878	18	76660436	C	G	0.35238	0.099641	0.000405471	431365	0.0471145
rs141200952	18	12407832	T	C	0.698279	0.18087	0.000113076	431365	0.0124296
rs375114339	19	16749963	C	T	-0.851333	0.216553	8.44929e-05	431365	0.0103227
rs75649430	19	16905455	C	A	0.7805	0.20715	0.000164695	431365	0.00878702
rs5023036	19	46517191	T	C	0.186492	0.0424728	1.12907e-05	431365	0.310162
rs143660183	19	47615306	A	G	-0.603816	0.171285	0.000423136	431365	0.0149852
rs74544477	19	44952220	C	T	0.341495	0.0920983	0.000208949	431365	0.0468445
rs79510082	19	46457976	C	T	-0.448452	0.122263	0.000244518	431365	0.0298208
rs117190810	19	58537665	T	C	0.50503	0.138359	0.000262084	431365	0.0206034
rs12461055	19	3272422	T	C	0.300231	0.0756415	7.21357e-05	431365	0.0767202
rs117843462	19	45405634	C	G	0.555149	0.153772	0.00030595	431365	0.0185944
rs10422599	19	46073034	G	A	-0.337142	0.0941459	0.000342208	431365	0.0464207
rs2004431	19	54852610	G	T	0.199932	0.0515804	0.000106133	431365	0.175113
rs146644952	19	58884591	T	C	-0.585653	0.15287	0.000127591	431365	0.0176593
rs4932746	19	22269847	C	T	0.191498	0.0512247	0.000185204	431365	0.813054
rs3810457	20	61338668	A	G	0.245297	0.0663236	0.00021688	431365	0.10116
rs141743902	20	39501633	T	A	0.702607	0.195857	0.000334072	431365	0.0116572
rs6018291	20	45756772	G	C	0.145837	0.0395278	0.000224709	431365	0.551704
rs117480867	20	46766696	A	G	-0.440742	0.11773	0.000181351	431365	0.02997
rs141718558	20	25539937	T	C	0.406757	0.115994	0.00045368	431365	0.029304
rs6117402	20	725981	G	T	-0.189045	0.051351	0.000231926	431365	0.18138
rs571847	20	753516	G	A	-0.156409	0.0413926	0.00015767	431365	0.633869
rs1699238	20	5840828	G	A	-0.151042	0.0397276	0.000143556	431365	0.441541
rs6077184	20	7292267	C	A	0.148008	0.0398461	0.000203606	431365	0.410934
rs11699453	20	56094824	A	G	-0.14752	0.0418742	0.000426815	431365	0.331322
rs553270827	20	17103677	A	G	-0.163237	0.0454171	0.000325424	431365	0.281263
rs150099202	20	5420354	T	C	0.34132	0.0934612	0.000260214	431365	0.046868
rs2206389	20	9453567	C	T	0.597134	0.151483	8.0837e-05	431365	0.980832
rs6138042	20	23682140	T	C	-0.182754	0.0480904	0.000144567	431365	0.213257
rs6143021	20	60897772	C	T	0.187074	0.0447123	2.8649e-05	431365	0.260711
rs4473461	20	350158	A	G	0.142583	0.0402235	0.000392961	431365	0.439759
rs6516034	20	5414546	A	G	-0.146179	0.0407671	0.000336179	431365	0.427001
rs6074967	20	15892512	A	G	-0.198272	0.0456079	1.37816e-05	431365	0.748658
rs79928654	20	37012327	C	T	0.7505	0.214298	0.000461551	431365	0.00838817
rs6044561	20	16978524	C	G	0.14355	0.0410146	0.000465318	431365	0.356301
rs6139653	20	574308	A	G	0.283237	0.0629694	6.85899e-06	431365	0.109957
rs6110851	20	1649078	G	A	-0.148958	0.0411575	0.000295495	431365	0.649876
rs77130726	20	6917668	A	G	0.236813	0.0657546	0.000316424	431365	0.099371
rs6095904	20	48997832	T	C	-0.343771	0.0975315	0.000423936	431365	0.0426727
rs73365907	21	40752001	A	G	0.36263	0.101262	0.000342129	431365	0.0397131
rs75701724	21	15443087	C	G	-0.547328	0.131793	3.28224e-05	431365	0.0234426
rs2824655	21	19519810	T	C	-0.230676	0.0590046	9.2506e-05	431365	0.870892
rs4816853	21	23028268	T	C	-0.153542	0.0405252	0.000151374	431365	0.609548
rs117456943	21	27823915	G	A	0.489866	0.134063	0.000258196	431365	0.0255628
rs2824640	21	19495093	C	A	0.184399	0.0419587	1.10892e-05	431365	0.331061
rs57078525	21	47937520	A	G	1.00868	0.282903	0.000363229	431365	0.00464922
rs77014096	21	38126507	C	T	0.458075	0.121071	0.000154622	431365	0.0266376
rs148435393	21	41029407	T	C	0.740344	0.20662	0.000339508	431365	0.00974187
rs1672118	21	44511294	C	G	0.141256	0.0395518	0.000355067	431365	0.561703
rs222955	21	27919864	T	C	0.144904	0.0409394	0.000400922	431365	0.635608
rs149417308	21	37673178	T	A	-0.921889	0.262262	0.000439501	431365	0.00663994
rs74976872	21	38360070	T	C	-0.381063	0.107039	0.000370817	431365	0.035027
rs2836067	21	39330134	C	T	0.162573	0.0453744	0.000339774	431365	0.26531
rs8178474	21	34649337	G	A	-0.21594	0.0607467	0.000378312	431365	0.117448
rs75033784	21	38331563	A	G	0.484189	0.124031	9.47044e-05	431365	0.0266162
rs73217376	21	41336939	C	T	0.35639	0.0967858	0.000231175	431365	0.042335
rs457662	21	20326726	G	A	0.157442	0.0397338	7.41925e-05	431365	0.495471
rs11913729	22	33940087	A	G	0.320798	0.0881377	0.000272917	431365	0.0530318
rs149004168	22	37949817	G	A	-0.627766	0.169693	0.000216083	431365	0.0164811
rs439440	22	21361240	T	C	-0.481282	0.120109	6.14837e-05	431365	0.0273427
rs8137707	22	44401191	T	C	0.288827	0.058852	9.21616e-07	431365	0.127964
rs8136643	22	49387773	C	T	0.371323	0.106334	0.000479314	431365	0.0391817
rs78879501	22	32877508	A	G	0.958351	0.228718	2.78824e-05	431365	0.00800586
rs383611	22	22752359	C	G	0.155218	0.0444846	0.000484395	431365	0.69334
rs475218	22	27634230	T	C	-0.33277	0.0944612	0.000426973	431365	0.950937
rs12166968	22	37621358	G	C	0.303181	0.0845393	0.000335436	431365	0.0571645
rs7510804	22	21379250	G	A	-0.392733	0.108179	0.000282996	431365	0.0353601
rs2401516	22	44412192	A	G	-0.178502	0.0479655	0.000198061	431365	0.280188
rs11913808	22	38033376	C	T	-0.290524	0.0707158	3.98529e-05	431365	0.0830224

## Sheet: S8 Table
S8 Table. Previously-reported genome-wide significant association of SNPs as genetic instruments of potential causal cytokines
cytokines	SNP	effect allele	trait	efo	beta	se	p	pmid	ancestry	year
MIP1b	rs117086316	A	Platelet distribution width	EFO_0004586	-0.04512	0.006959	8.97e-11	27863252	European	2016
MIP1b	rs117086316	A	Reticulocyte count	EFO_0004586	0.05547	0.00695	1.44e-15	27863252	European	2016
MIP1b	rs117086316	A	Reticulocyte fraction of red cells	EFO_0004586	0.05728	0.006946	1.62e-16	27863252	European	2016
MIP1b	rs8064395	A	High light scatter percentage of red cells	EFO_0004586	0.03063	0.005551	3.42e-08	27863252	European	2016
MIP1b	rs8064395	A	Reticulocyte count	EFO_0004586	0.04112	0.005557	1.37e-13	27863252	European	2016
MIP1b	rs8064395	A	Reticulocyte fraction of red cells	EFO_0004586	0.04362	0.005554	4.05e-15	27863252	European	2016

## Sheet: S9 Table
S9 Table. Genetic association estimates that were used in the external validation
Cytokine	rsid	chr_name	chrom_start	EA_exposure	NEA_exposure	BETA_exposure	SE_exposure	P	instr	source
MIP1b	rs72833539	17	34444424	T	C	-0.0353	0.0132	0.00754	eQTL	Bouras E et al.
MIP1b	rs854658	17	34352666	A	G	-0.0338	0.0077	1.142e-05	eQTL	Bouras E et al.
MIP1b	rs1634503	17	34421139	A	G	-0.0752	0.0097	9.538e-15	eQTL	Bouras E et al.
CCL4	rs2376468	17	34461903	C	G	-0.1251	0.0167	6.83e-14	pQTL	Zhao J et al.
CCL4	rs2522110	17	34485994	T	G	0.1315	0.0194	1.22e-11	pQTL	Zhao J et al.
CCL4	rs149370547	17	34486433	C	G	-0.5516	0.074	9.05e-14	pQTL	Zhao J et al.
CCL4	rs182861269	17	34487889	A	C	0.3756	0.0472	1.75e-15	pQTL	Zhao J et al.
CCL4	rs187348776	17	34535622	A	T	0.1496	0.0258	6.69e-09	pQTL	Zhao J et al.
CCL4	rs62079582	17	34813754	A	G	0.1087	0.018	1.55e-09	pQTL	Zhao J et al.
CCL4	rs8064426	17	34819750	A	G	-0.4104	0.0173	2.11e-124	pQTL	Zhao J et al.
CCL4	rs113308217	17	34823005	T	C	0.2934	0.0441	2.87e-11	pQTL	Zhao J et al.
CCL4	rs139925642	17	34823492	T	C	0.3856	0.0702	3.95e-08	pQTL	Zhao J et al.
CCL4	rs868340	17	34832620	A	T	-0.1341	0.0121	1.52e-28	pQTL	Zhao J et al.
CCL4	rs80130551	17	34833820	A	G	-0.4232	0.0376	2.18e-29	pQTL	Zhao J et al.
CCL4	rs79010839	17	34901949	T	C	0.1279	0.0232	3.53e-08	pQTL	Zhao J et al.
CCL4	rs117010890	17	34916971	T	C	-0.1693	0.0293	7.55e-09	pQTL	Zhao J et al.
CCL4	rs17692864	17	34945214	T	C	0.2321	0.0283	2.38e-16	pQTL	Zhao J et al.
CCL4	rs17693183	17	34964290	A	G	-0.3731	0.0507	1.85e-13	pQTL	Zhao J et al.
CCL4	rs9330240	17	34974689	T	C	-0.291	0.0277	8.16e-26	pQTL	Zhao J et al.
CCL4	rs62069151	17	34986068	A	G	0.1875	0.0214	1.92e-18	pQTL	Zhao J et al.
CCL4	rs975577	17	34986640	A	G	-0.0992	0.0128	9.19e-15	pQTL	Zhao J et al.
CCL4	rs2240000	17	34990683	T	C	0.0718	0.0131	4.23e-08	pQTL	Zhao J et al.
CCL4	rs111887239	17	34991417	T	C	-0.2474	0.0374	3.72e-11	pQTL	Zhao J et al.

## Sheet: S10 Table
S10 Table. Baseline characteristics of critically ill ICU patients with and without sepsis
Characteristics	Sepsis group (n=15)	Non-sepsis group (n=11)	Test statistic (t/χ²)	P value
Ages (years)	62.20 (±15.34)	51.55 (±9.37)	2.035	0.053
Male, n (%)	8(53.3%)	9(81.8%)	1.191	0.275
APACHE II score	17.55 (±8.71)	14.00 (±10.677)	0.66	0.521
CRP (mg/L)	68.41 (±30.23)	19.10 (±17.84)	5.201	<0.001
PCT (ng/mL)	20.67 (±33.25)	0.27 (±0.53)	2.375	0.032
IL-6 (pg/mL)	476.20(±1051.08)	32.38 (±43.41)	1.633	0.125
SAA (mg/L)	132.67(±111.23)	55.03 (±66.93)	2.212	0.037
CCL4 (pg/mL)	387.94(±101.85)	200.27(±53.19)	5.56	<0.001
Data are presented as mean ± standard deviation (SD) unless otherwise indicated. Abbreviations: CRP, C-reactive protein; PCT, procalcitonin; IL-6, interleukin-6; SAA, serum amyloid A; CCL4, C-C motif chemokine ligand 4.

[truncated: 1 more sheets: S11 Table]
